# Supplementary material for: Clinical application of genomic profiling to find druggable targets for adolescent and young adult (AYA) cancer patients with metastasis
Source: Springer Nature journal article supplement (doi:10.1186/s12885-016-2209-1), 2016-02-29
Supplement: MOESM2 [file 9746198]

**Table S1. Sequencing information for WES data**

| Sample                       | AYA01_Normal   | AYA01_Tumor    | AYA02_Normal   | AYA02_Tumor    | AYA04_Normal   | AYA04_Tumor    |
|------------------------------|----------------|----------------|----------------|----------------|----------------|----------------|
| Target Regions               | 199,259        | 199,259        | 199,259        | 199,259        | 199,259        | 199,259        |
| Bases in Target Region       | 70,369,848     | 70,369,848     | 70,369,848     | 70,369,848     | 70,369,848     | 70,369,848     |
| Bases Sequenced              | 14,340,725,784 | 13,394,620,000 | 17,853,383,170 | 15,593,444,136 | 26,970,195,236 | 19,997,019,694 |
| Mean Target Coverage         | 145.01         | 129.82         | 118.97         | 103.26         | 205.08         | 190.36         |
| % of targets at coverage 30X | 92.61          | 91.91          | 90.29          | 87.03          | 96.04          | 91.00          |

| Sample                       | AYA06_Normal   | AYA06_Tumor    | AYA07_Normal   | AYA07_Tumor    | AYA10_Normal   | AYA10_Tumor    |
|------------------------------|----------------|----------------|----------------|----------------|----------------|----------------|
| Target Regions               | 199,259        | 199,259        | 199,259        | 199,259        | 199,259        | 199,259        |
| Bases in Target Region       | 70,369,848     | 70,369,848     | 70,369,848     | 70,369,848     | 70,369,848     | 70,369,848     |
| Bases Sequenced              | 20,503,746,592 | 19,863,262,162 | 13,348,069,706 | 13,796,972,488 | 12,669,135,182 | 12,476,740,282 |
| Mean Target Coverage         | 194.76         | 164.54         | 119.20         | 121.96         | 115.38         | 101.3          |
| % of targets at coverage 30X | 95.55          | 93.93          | 89.44          | 88.84          | 90.8           | 86.03          |

|                                     | AYAs_Normal     | AYAs_Tumor     |
|-------------------------------------|-----------------|----------------|
| Bases Sequenced                     | 105,685,255,670 | 95,122,058,762 |
| Mean Target Coverage                | 149.73          | 135.21         |
| % of targets at coverage 30X (mean) | 92.46           | 89.79          |
