# Supplementary material for: Clinical application of genomic profiling to find druggable targets for adolescent and young adult (AYA) cancer patients with metastasis
Source: Springer Nature journal article supplement (doi:10.1186/s12885-016-2209-1), 2016-02-29
Supplement: MOESM3 [file 9746198]

**Table S2. Mutation frequency of WES data for AYA cancers**

|                                                | AYA01      | AYA02       | AYA04       | AYA06       | AYA07                                                                                   | AYA10 |
|------------------------------------------------|------------|-------------|-------------|-------------|-----------------------------------------------------------------------------------------|-------|
| <b>Somatic mutation/Mb</b>                     | 0.37       | 0.69        | 1.87        | 0.56        | 9.37                                                                                    | 0.39  |
| <b>Number of somatic mutations</b>             | 26         | 49          | 133         | 40          | 665                                                                                     | 28    |
| <b>Synonymous SNV</b>                          | 1          | 8           | 28          | 3           | 157                                                                                     | 5     |
| <b>Nonsynonymous SNV</b>                       | 10         | 13          | 83          | 15          | 441                                                                                     | 12    |
| <b>Nonsense</b>                                | 3          | 1           | 6           | 1           | 5                                                                                       | 0     |
| <b>Stoploss</b>                                | 0          | 0           | 0           | 0           | 2                                                                                       | 0     |
| <b>Splicing mutation</b>                       | 2          | 2           | 1           | 2           | 14                                                                                      | 1     |
| <b>ncRNA mutation</b>                          | 3          | 8           | 8           | 5           | 34                                                                                      | 0     |
| <b>Indels</b>                                  | 7          | 17          | 7           | 14          | 12                                                                                      | 10    |
| <b>DNA repair genes<br/>/Mutation context*</b> | TDG<br>/ns | TP53<br>/ns | TP53<br>/sp | MSH3<br>/ns | DDB1/ns<br>LIG3/ns<br>MNAT1/ns<br>POLE/ns<br>POLG/ns<br>POLQ/ns                         | -     |
| <b>Allele freq. of<br/>DNA repair genes</b>    | 0.05       | 0.58        | 0.28        | 0.1         | 0.06 (DDB1)<br>0.06 (LIG3)<br>0.08 (MNAT1)<br>0.06 (POLE)<br>0.06 (POLG)<br>0.27 (POLQ) | -     |

\*ns- nonsynonymous SNV, sp: splicing alteration
