# Supplementary material for: Clinical application of genomic profiling to find druggable targets for adolescent and young adult (AYA) cancer patients with metastasis
Source: Springer Nature journal article supplement (doi:10.1186/s12885-016-2209-1), 2016-02-29
Supplement: MOESM4 [file 9746198]

**Table S3. Processed WES data**

**(A) AYA01**

| Chr | Start     | End       | Ref                  | Alt | Altered gene | T_Ref | T_Alt | dbSNP138    |             | CVE list |   |   | Mutation context** |
|-----|-----------|-----------|----------------------|-----|--------------|-------|-------|-------------|-------------|----------|---|---|--------------------|
|     |           |           |                      |     |              |       |       | All         | NonFlagged* | C        | V | E |                    |
| 1   | 110050210 | 110050210 | G                    | GC  | AMIGO1       | 106   | 6     | -           | -           | -        | - | - | FS ins             |
| 8   | 131127909 | 131127909 | C                    | A   | ASAP1        | 85    | 7     | -           | -           | -        | - | - | nonsense           |
| 17  | 29162451  | 29162451  | G                    | A   | ATAD5        | 71    | 10    | -           | -           | -        | - | - | nsSNV              |
| 14  | 96730408  | 96730408  | C                    | T   | BDKRB1       | 120   | 24    | -           | -           | -        | - | - | nsSNV              |
| 9   | 135762805 | 135762805 | T                    | G   | C9orf9       | 12    | 4     | -           | -           | -        | - | - | nsSNV              |
| 16  | 69155012  | 69155012  | G                    | A   | CHTF8        | 122   | 8     | rs375808540 | rs375808540 | -        | - | - | nsSNV              |
| 8   | 37888131  | 37888131  | G                    | GC  | EIF4EBP1     | 45    | 6     | -           | -           | -        | - | - | FS ins             |
| 22  | 29630189  | 29630189  | G                    | T   | EMID1        | 31    | 3     | -           | -           | -        | - | - | splicing           |
| 11  | 68700794  | 68700794  | C                    | A   | IGHMBP2      | 23    | 5     | -           | -           | -        | - | - | nsSNV              |
| 19  | 46387815  | 46387815  | C                    | T   | IRF2BP1      | 119   | 17    | -           | -           | -        | - | - | sSNV               |
| 1   | 15386680  | 15386680  | G                    | GCC | KAZN         | 248   | 15    | -           | -           | -        | - | - | FS ins             |
| 11  | 65266568  | 65266568  | T                    | C   | MALAT1       | 41    | 7     | -           | -           | -        | - | - | ncRNA              |
| 22  | 51048683  | 51048683  | G                    | GC  | MAPK8IP2     | 84    | 6     | -           | -           | -        | - | O | UN                 |
| 20  | 29637976  | 29637976  | G                    | C   | MLLT10P1     | 14    | 4     | -           | -           | -        | - | - | ncRNA              |
| 7   | 100645731 | 100645731 | G                    | A   | MUC12        | 44    | 3     | -           | -           | -        | - | - | nsSNV              |
| 13  | 77642780  | 77642780  | G                    | A   | MYCBP2       | 56    | 5     | -           | -           | -        | - | - | nonsense           |
| 2   | 203991403 | 203991403 | C                    | A   | NBEAL1       | 158   | 12    | -           | -           | -        | - | - | nsSNV              |
| 17  | 29588833  | 29588834  | GC                   | G   | NF1          | 216   | 45    | -           | -           | -        | O | O | FS del             |
| 1   | 248154493 | 248154493 | T                    | C   | OR2L1P       | 8     | 3     | -           | -           | -        | - | - | ncRNA              |
| 17  | 7411682   | 7411682   | C                    | T   | POLR2A       | 142   | 11    | -           | -           | -        | - | - | nsSNV              |
| X   | 150869103 | 150869103 | C                    | A   | PRRG3        | 32    | 11    | -           | -           | -        | - | - | nsSNV              |
| 3   | 141327541 | 141327541 | T                    | A   | RASA2        | 31    | 3     | -           | -           | -        | - | - | splicing           |
| 3   | 141278819 | 141278819 | A                    | AT  | RASA2        | 108   | 11    | -           | -           | -        | - | - | FS ins             |
| 21  | 33043756  | 33043756  | C                    | A   | SCAF4        | 97    | 5     | -           | -           | -        | - | - | nonsense           |
| 11  | 64323714  | 64323714  | G                    | GC  | SLC22A11     | 167   | 9     | -           | -           | -        | - | - | FS ins             |
| 22  | 26879946  | 26879967  | GGAGGCGGCGCCCGGGGAGA | G   | SRRD         | 77    | 25    | -           | -           | -        | - | - | IF del             |
| 12  | 104376700 | 104376700 | A                    | C   | TDG          | 78    | 4     | rs61937630  | rs61937630  | -        | - | - | nsSNV              |

\*NonFlagged: dbSNP files subtracting Flagged dbSNP entries. Flagged SNPs include SNPs < 1% minor allele frequency (MAF) (or unknown), mapping only once to reference assembly, flagged in dbSNP as "clinically associated".

\*\*nsSNV: non-synonymous SNV, sSNV: synonymous SNV, FS ins: frameshift insertion, FS del: frameshift deletion, IF ins: in-frame insertion, IF del: in-frame deletion, ncRNA: non-coding RNA, UN: Unknown. transcript maps to multiple locations, all as "coding transcripts", but none has a complete ORF.

**Table S3. Processed WES data**

**(B) AYA02**

| Chr | Start     | End       | Ref          | Alt   | Altered gene | T_Ref | T_Alt | dbSNP138    |             | CVE list |   |   | Mutation context** |
|-----|-----------|-----------|--------------|-------|--------------|-------|-------|-------------|-------------|----------|---|---|--------------------|
|     |           |           |              |       |              |       |       | All         | NonFlagged* | C        | V | E |                    |
| 7   | 152513619 | 152513619 | G            | A     | ACTR3B       | 71    | 10    | -           | -           | -        | - | - | sSNV               |
| 7   | 134132780 | 134132783 | ATCC         | A     | AKR1B1       | 35    | 37    | -           | -           | -        | - | - | IF del             |
| 17  | 79954560  | 79954560  | G            | GC    | ASPSCR1      | 114   | 6     | -           | -           | O        | - | - | FS ins             |
| 3   | 10401667  | 10401667  | G            | A     | ATP2B2       | 71    | 4     | -           | -           | -        | - | - | sSNV               |
| 16  | 84495698  | 84495698  | G            | A     | ATP2C2       | 38    | 3     | -           | -           | -        | - | - | sSNV               |
| 1   | 28564378  | 28564378  | G            | GA    | ATPIF1       | 30    | 72    | -           | -           | -        | - | - | FS ins             |
| 12  | 112036746 | 112036749 | GGGC         | G     | ATXN2        | 4     | 7     | -           | -           | -        | - | - | IF del             |
| 13  | 70713509  | 70713509  | A            | ACTGC | ATXN8OS      | 4     | 9     | -           | -           | -        | - | - | ncRNA              |
| 9   | 121929604 | 121929604 | G            | GTGT  | BRINP1       | 44    | 61    | -           | -           | -        | - | - | IF ins             |
| 7   | 2963980   | 2963980   | G            | GT    | CARD11       | 23    | 18    | -           | -           | O        | O | - | FS ins             |
| 17  | 78165189  | 78165189  | G            | A     | CARD14       | 41    | 6     | -           | -           | -        | - | - | nsSNV              |
| 16  | 1484849   | 1484849   | G            | A     | CCDC154      | 22    | 20    | -           | -           | -        | - | - | nsSNV              |
| 22  | 37964408  | 37964429  | CCAGCGCCTGCT | C     | CDC42EP1     | 16    | 14    | -           | -           | -        | - | - | IF del             |
| 1   | 51436116  | 51436116  | C            | T     | CDKN2C       | 10    | 20    | -           | -           | O        | O | - | nonsense           |
| 14  | 105352853 | 105352853 | C            | CG    | CEP170B      | 51    | 6     | -           | -           | -        | - | - | FS ins             |
| 11  | 46342080  | 46342081  | GT           | G     | CREB3L1      | 111   | 6     | -           | -           | O        | - | - | splicing           |
| 11  | 46321710  | 46321710  | C            | T     | CREB3L1      | 47    | 6     | -           | -           | O        | - | - | sSNV               |
| 1   | 225528183 | 225528183 | C            | A     | DNAH14       | 132   | 6     | rs3856145   | rs3856145   | -        | - | - | nsSNV              |
| 16  | 3706179   | 3706179   | G            | A     | DNASE1       | 155   | 6     | -           | -           | -        | - | - | nsSNV              |
| 4   | 88537072  | 88537081  | TAGCAGTGAC   | T     | DSPP         | 4     | 10    | -           | -           | -        | - | - | IF del             |
| 3   | 58084486  | 58084486  | A            | G     | FLNB         | 9     | 17    | rs145673747 | rs145673747 | -        | - | - | nsSNV              |
| 5   | 162909996 | 162909996 | T            | C     | HMMR-AS1     | 103   | 31    | -           | -           | -        | - | - | ncRNA              |
| 12  | 56428760  | 56428760  | C            | CG    | IKZF4        | 93    | 6     | -           | -           | -        | - | - | FS ins             |
| 5   | 128440934 | 128440934 | A            | G     | ISOC1        | 51    | 35    | -           | -           | -        | - | - | sSNV               |
| 16  | 919000    | 919000    | G            | A     | LMF1         | 36    | 25    | -           | -           | -        | - | - | sSNV               |
| 10  | 29776325  | 29776327  | TAA          | T     | LOC102724316 | 10    | 6     | -           | -           | -        | - | - | ncRNA              |
| 2   | 66667039  | 66667039  | C            | CG    | MEIS1        | 84    | 7     | -           | -           | -        | - | - | FS ins             |
| 17  | 4796837   | 4796837   | G            | A     | MINK1        | 26    | 47    | -           | -           | -        | - | - | nsSNV              |
| 22  | 46507545  | 46507547  | AAG          | A     | MIRLET7BHG   | 86    | 8     | -           | -           | -        | - | - | ncRNA              |
| 12  | 40918902  | 40918902  | T            | C     | MUC19        | 42    | 3     | -           | -           | -        | - | - | UN                 |
| 5   | 16694605  | 16694605  | G            | GC    | MYO10        | 158   | 10    | -           | -           | -        | - | - | FS ins             |
| 3   | 196669594 | 196669594 | C            | T     | NCBP2-AS2    | 9     | 19    | -           | -           | -        | - | - | ncRNA              |
| 15  | 24921468  | 24921468  | T            | TG    | NPAP1        | 83    | 8     | -           | -           | -        | - | - | FS ins             |
| 9   | 131222915 | 131222915 | A            | AC    | ODF2         | 80    | 9     | -           | -           | -        | - | - | FS ins             |
| 16  | 67695546  | 67695546  | G            | GC    | PARD6A       | 184   | 14    | -           | -           | -        | - | - | FS ins             |
| 11  | 3845151   | 3845151   | C            | CG    | PGAP2        | 120   | 12    | -           | -           | -        | - | - | FS ins             |
| 17  | 6374655   | 6374655   | T            | A     | PITPNM3      | 3     | 12    | -           | -           | -        | - | - | nsSNV              |
| 7   | 75157156  | 75157156  | T            | TC    | PMS2P3       | 61    | 7     | -           | -           | -        | - | - | ncRNA              |
| 22  | 46631080  | 46631080  | A            | C     | PPARA        | 13    | 4     | -           | -           | -        | - | - | nsSNV              |
| 9   | 127920662 | 127920662 | C            | T     | PPP6C        | 57    | 10    | -           | -           | -        | - | O | splicing           |
| 14  | 24605476  | 24605476  | C            | T     | PSME1        | 34    | 3     | -           | -           | -        | - | - | nsSNV              |
| 7   | 127729577 | 127729577 | C            | T     | SND1         | 41    | 19    | -           | -           | -        | - | - | nsSNV              |
| 15  | 100889519 | 100889519 | C            | T     | SPATA41      | 188   | 123   | -           | -           | -        | - | - | ncRNA              |
| 4   | 124323691 | 124323691 | G            | T     | SPRY1        | 21    | 42    | -           | -           | -        | - | - | nsSNV              |
| 19  | 56029967  | 56029967  | C            | CT    | SSC5D        | 174   | 15    | -           | -           | -        | - | - | FS ins             |
| 12  | 65269550  | 65269550  | T            | C     | TBC1D30      | 24    | 54    | -           | -           | -        | - | - | sSNV               |
| 3   | 30664743  | 30664743  | G            | T     | TGFBR2       | 109   | 10    | -           | -           | -        | - | O | nsSNV              |
| 17  | 7577572   | 7577572   | T            | C     | TP53         | 6     | 8     | -           | -           | O        | O | O | nsSNV              |
| 19  | 21926904  | 21926904  | G            | T     | ZNF100       | 68    | 4     | -           | -           | -        | - | - | sSNV               |
| 10  | 43014402  | 43014404  | AAG          | A     | ZNF37BP      | 43    | 6     | -           | -           | -        | - | - | ncRNA              |

\*NonFlagged: dbSNP files subtracting Flagged dbSNP entries. Flagged SNPs include SNPs < 1% minor allele frequency (MAF) (or unknown), mapping only once to reference assembly, flagged in dbSnp as "clinically associated".

\*\*nsSNV: non-synonymous SNV, sSNV: synonymous SNV, FS ins: frameshift insertion, FS del: frameshift deletion, IF ins: in-frame insertion, IF del: in-frame deletion, ncRNA: non-coding RNA, UN: Unknown. transcript maps to multiple locations, all as "coding transcripts", but none has a complete ORF.

Table S3. Processed WES data

## (C) AYA04

| Chr | Start     | End       | Ref | Alt | Altered gene      | T_Ref | T_Alt | dbSNP138    |             | CVE list |   |   | Mutation context** |
|-----|-----------|-----------|-----|-----|-------------------|-------|-------|-------------|-------------|----------|---|---|--------------------|
|     |           |           |     |     |                   |       |       | All         | NonFlagged* | C        | V | E |                    |
| 10  | 114181766 | 114181766 | C   | T   | ACSL5             | 135   | 29    | -           | -           | -        | - | - | sSNV               |
| 10  | 127755315 | 127755315 | C   | A   | ADAM12            | 177   | 13    | -           | -           | -        | - | - | nsSNV              |
| 5   | 7826867   | 7826867   | C   | T   | ADCY2             | 183   | 48    | -           | -           | -        | - | - | sSNV               |
| 1   | 980882    | 980882    | G   | A   | AGRN              | 157   | 19    | rs148315419 | rs148315419 | -        | - | - | nsSNV              |
| 2   | 131520783 | 131520783 | G   | A   | AMER3             | 198   | 49    | -           | -           | -        | - | - | nsSNV              |
| 4   | 114275811 | 114275811 | C   | T   | ANK2              | 63    | 12    | -           | -           | -        | - | - | nsSNV              |
| 4   | 125631581 | 125631581 | A   | T   | ANKRD50           | 249   | 62    | -           | -           | -        | - | - | nsSNV              |
| 2   | 219114594 | 219114594 | G   | C   | ARPC2             | 232   | 51    | -           | -           | -        | - | - | sSNV               |
| 7   | 150721080 | 150721080 | G   | A   | ATG9B             | 100   | 6     | -           | -           | -        | - | - | UN                 |
| 15  | 50190393  | 50190393  | C   | T   | ATP8B4            | 100   | 6     | -           | -           | -        | - | - | nsSNV              |
| 1   | 193149870 | 193149870 | G   | A   | B3GALT2           | 216   | 22    | -           | -           | -        | - | - | nsSNV              |
| 9   | 135458462 | 135458462 | C   | A   | BARHL1            | 119   | 7     | -           | -           | -        | - | - | nsSNV              |
| 17  | 65924573  | 65924573  | G   | T   | BPTF              | 234   | 11    | -           | -           | -        | - | - | nsSNV              |
| 17  | 65924590  | 65924590  | A   | G   | BPTF              | 233   | 12    | -           | -           | -        | - | - | sSNV               |
| 1   | 11008227  | 11008227  | C   | T   | C1orf127          | 254   | 65    | -           | -           | -        | - | - | sSNV               |
| 20  | 1187715   | 1187715   | G   | T   | C20orf202         | 129   | 7     | -           | -           | -        | - | - | nsSNV              |
| 9   | 35674208  | 35674208  | T   | C   | CA9               | 63    | 4     | -           | -           | -        | - | - | sSNV               |
| 12  | 2705120   | 2705120   | T   | C   | CACNA1C           | 771   | 32    | -           | -           | -        | - | - | nsSNV              |
| 12  | 1996184   | 1996184   | T   | C   | CACNA2D4          | 15    | 10    | -           | -           | -        | - | - | nsSNV              |
| 12  | 7653878   | 7653878   | T   | G   | CD163             | 808   | 40    | -           | -           | -        | - | O | nsSNV              |
| 10  | 85974315  | 85974315  | C   | A   | CDHR1             | 191   | 13    | -           | -           | -        | - | - | nsSNV              |
| 17  | 30815356  | 30815356  | G   | C   | CDK5R1            | 236   | 18    | -           | -           | -        | - | - | nsSNV              |
| 17  | 46053334  | 46053334  | A   | G   | CDK5RAP3          | 102   | 5     | -           | -           | -        | - | - | sSNV               |
| 22  | 17669307  | 17669309  | GCA | G   | CECR1             | 227   | 22    | -           | -           | -        | - | - | FS del             |
| 1   | 6166747   | 6166747   | G   | A   | CHD5              | 53    | 11    | rs371741094 | -           | -        | - | - | nsSNV              |
| 2   | 101009849 | 101009849 | G   | A   | CHST10            | 120   | 50    | -           | -           | -        | - | - | nsSNV              |
| 12  | 122794338 | 122794338 | T   | A   | CLIP1             | 24    | 7     | -           | -           | -        | - | - | nsSNV              |
| 3   | 130187801 | 130187801 | T   | G   | COL6A5            | 282   | 22    | -           | -           | -        | - | - | nsSNV              |
| 22  | 37322114  | 37322114  | T   | A   | CSF2RB            | 130   | 10    | -           | -           | -        | - | - | nsSNV              |
| 2   | 80085214  | 80085214  | G   | A   | CTNNA2            | 130   | 24    | -           | -           | -        | - | - | nsSNV              |
| 10  | 104596845 | 104596845 | C   | T   | CYP17A1           | 237   | 18    | -           | -           | -        | - | - | nsSNV              |
| 10  | 94834660  | 94834660  | A   | T   | CYP26A1           | 103   | 6     | -           | -           | -        | - | - | nsSNV              |
| 11  | 6662114   | 6662114   | G   | C   | DCHS1             | 175   | 12    | -           | -           | -        | - | - | nsSNV              |
| 4   | 155163852 | 155163852 | A   | C   | DCHS2             | 143   | 20    | -           | -           | -        | - | - | sSNV               |
| 12  | 9574060   | 9574060   | A   | T   | DDX12P            | 186   | 6     | -           | -           | -        | - | - | ncRNA              |
| 3   | 38080791  | 38080791  | G   | A   | DLEC1             | 151   | 45    | -           | -           | -        | - | - | sSNV               |
| 6   | 170592616 | 170592616 | C   | CG  | DLL1              | 107   | 6     | -           | -           | -        | - | - | FS ins             |
| 17  | 76457652  | 76457652  | C   | A   | DNAH17            | 105   | 13    | -           | -           | -        | - | - | nonsense           |
| 17  | 11513721  | 11513721  | C   | T   | DNAH9             | 142   | 11    | -           | -           | -        | - | - | nsSNV              |
| 1   | 65867548  | 65867548  | G   | A   | DNAJC6            | 147   | 10    | rs140156759 | rs140156759 | -        | - | - | nsSNV              |
| 4   | 88534407  | 88534409  | AAT | A   | DSPP              | 102   | 15    | -           | -           | -        | - | - | FS del             |
| 6   | 74228438  | 74228438  | T   | A   | EEF1A1            | 128   | 5     | -           | -           | -        | - | - | nsSNV              |
| 2   | 27587675  | 27587675  | G   | A   | EIF2B4            | 135   | 8     | -           | -           | -        | - | - | nonsense           |
| 6   | 65301613  | 65301613  | A   | C   | EYS               | 392   | 20    | -           | -           | -        | - | - | nsSNV              |
| 4   | 187524594 | 187524594 | G   | GT  | FAT1              | 326   | 82    | -           | -           | -        | - | O | FS ins             |
| 11  | 92534689  | 92534689  | G   | C   | FAT3              | 87    | 7     | -           | -           | -        | - | - | nsSNV              |
| 3   | 13612717  | 13612717  | G   | C   | FBLN2             | 27    | 6     | -           | -           | -        | - | - | nsSNV              |
| 1   | 171121179 | 171121179 | G   | A   | FMO6P             | 414   | 26    | -           | -           | -        | - | - | ncRNA              |
| 12  | 8195263   | 8195263   | C   | T   | FOXJ2             | 738   | 98    | -           | -           | -        | - | - | nsSNV              |
| 3   | 138665096 | 138665096 | G   | C   | FOXL2             | 47    | 20    | -           | -           | O        | O | - | nsSNV              |
| 1   | 247694105 | 247694106 | GC  | G   | GCSAML-AS1        | 34    | 12    | -           | -           | -        | - | - | ncRNA              |
| 4   | 44709876  | 44709876  | T   | C   | GNPDA2            | 171   | 19    | -           | -           | -        | - | - | nsSNV              |
| 15  | 22743407  | 22743407  | G   | A   | GOLGA6L1,GOLGA6L2 | 35    | 3     | rs200513306 | rs200513306 | -        | - | - | nsSNV              |
| 16  | 57608811  | 57608811  | G   | T   | GPR114            | 54    | 7     | -           | -           | -        | - | - | sSNV               |
| 5   | 89923515  | 89923515  | A   | C   | GPR98             | 112   | 6     | -           | -           | -        | - | - | nsSNV              |
| 3   | 141497247 | 141497247 | G   | A   | GRK7              | 98    | 35    | -           | -           | -        | - | - | nsSNV              |
| X   | 51487056  | 51487056  | C   | T   | GSPT2             | 43    | 19    | -           | -           | -        | - | - | nsSNV              |
| 6   | 29856463  | 29856463  | T   | G   | HLA-H             | 38    | 4     | -           | -           | -        | - | - | ncRNA              |
| 6   | 55443760  | 55443760  | G   | C   | HMGCLL1           | 216   | 17    | -           | -           | -        | - | - | nsSNV              |
| 2   | 177016663 | 177016663 | C   | T   | HOXD4             | 22    | 3     | -           | -           | -        | - | - | nsSNV              |
| 2   | 234079144 | 234079144 | G   | A   | INPP5D            | 46    | 6     | -           | -           | -        | - | - | UN                 |
| 3   | 12977592  | 12977592  | C   | T   | IQSEC1            | 81    | 6     | -           | -           | -        | - | - | sSNV               |
| 2   | 227662160 | 227662162 | CCA | C   | IRS1              | 135   | 8     | -           | -           | -        | - | - | FS del             |
| 12  | 2926407   | 2926407   | G   | A   | ITFG2             | 254   | 18    | -           | -           | -        | - | - | nsSNV              |
| 17  | 73736508  | 73736508  | A   | T   | ITGB4             | 126   | 14    | -           | -           | -        | - | - | nsSNV              |
| 4   | 6037730   | 6037730   | A   | T   | JAKMIP1           | 93    | 7     | -           | -           | -        | - | - | sSNV               |
| 1   | 39880094  | 39880094  | C   | T   | KIAA0754          | 202   | 20    | -           | -           | -        | - | - | nsSNV              |
| 22  | 33700389  | 33700389  | C   | T   | LARGE             | 122   | 6     | -           | -           | -        | - | - | nsSNV              |
| 13  | 53277762  | 53277762  | A   | C   | LECT1             | 297   | 32    | -           | -           | -        | - | - | nsSNV              |

|    |           |           |      |     |            |     |     |            |            |   |   |   |          |
|----|-----------|-----------|------|-----|------------|-----|-----|------------|------------|---|---|---|----------|
| 1  | 202266700 | 202266700 | G    | T   | LGR6       | 190 | 21  | -          | -          | - | - | - | nonsense |
| 6  | 33554802  | 33554802  | A    | AAC | LINC00336  | 5   | 6   | -          | -          | - | - | - | ncRNA    |
| 19 | 1556803   | 1556803   | C    | A   | MEX3D      | 132 | 15  | -          | -          | - | - | - | nonsense |
| 15 | 89453045  | 89453045  | G    | A   | MFGE8      | 32  | 4   | -          | -          | - | - | O | sSNV     |
| 7  | 7612489   | 7612489   | G    | C   | MIOS       | 179 | 15  | -          | -          | - | - | - | nsSNV    |
| 7  | 7612490   | 7612490   | G    | T   | MIOS       | 176 | 16  | -          | -          | - | - | - | nsSNV    |
| 4  | 4864581   | 4864581   | C    | T   | MSX1       | 63  | 6   | -          | -          | - | - | - | nsSNV    |
| 11 | 1080576   | 1080576   | G    | A   | MUC2       | 90  | 4   | -          | -          | - | - | - | sSNV     |
| 16 | 48595053  | 48595053  | G    | A   | N4BP1      | 227 | 65  | -          | -          | - | - | - | nsSNV    |
| 17 | 7227216   | 7227216   | G    | A   | NEURL4     | 277 | 27  | -          | -          | - | - | - | sSNV     |
| 14 | 36988746  | 36988746  | T    | TC  | NKX2-1-AS1 | 227 | 12  | -          | -          | - | - | - | ncRNA    |
| 1  | 162040068 | 162040068 | C    | T   | NOS1AP     | 222 | 23  | -          | -          | - | - | - | nsSNV    |
| 11 | 123887008 | 123887008 | C    | A   | OR10G4     | 210 | 13  | -          | -          | - | - | - | nsSNV    |
| 11 | 5443470   | 5443470   | T    | G   | OR51Q1     | 841 | 60  | -          | -          | - | - | - | nsSNV    |
| X  | 99662510  | 99662510  | G    | A   | PCDH19     | 87  | 59  | -          | -          | - | - | - | sSNV     |
| 4  | 30724475  | 30724475  | G    | T   | PCDH7      | 234 | 13  | -          | -          | - | - | O | nsSNV    |
| 8  | 52744090  | 52744090  | T    | C   | PCMTD1     | 45  | 4   | -          | -          | - | - | O | nsSNV    |
| 21 | 44180483  | 44180483  | C    | T   | PDE9A      | 224 | 48  | -          | -          | - | - | - | nsSNV    |
| 16 | 20387485  | 20387485  | G    | A   | PDILT      | 79  | 24  | -          | -          | - | - | - | nonsense |
| 20 | 8639311   | 8639311   | G    | T   | PLCB1      | 129 | 8   | -          | -          | - | - | - | nsSNV    |
| 20 | 8782781   | 8782781   | C    | T   | PLCB1      | 87  | 10  | -          | -          | - | - | - | nsSNV    |
| 2  | 68613666  | 68613666  | C    | T   | PLEK       | 170 | 14  | -          | -          | - | - | - | nonsense |
| 1  | 204226768 | 204226768 | C    | T   | PLEKHA6    | 54  | 6   | -          | -          | - | - | O | nsSNV    |
| 11 | 65046261  | 65046261  | C    | T   | POLA2      | 76  | 30  | -          | -          | - | - | - | sSNV     |
| 2  | 132021766 | 132021766 | A    | C   | POTEE      | 79  | 7   | -          | -          | - | - | - | nsSNV    |
| 7  | 150069952 | 150069952 | G    | C   | REPIN1     | 140 | 16  | -          | -          | - | - | - | nsSNV    |
| 10 | 62645914  | 62645914  | C    | T   | RHOBTB1    | 494 | 101 | -          | -          | - | - | - | nsSNV    |
| 2  | 114369818 | 114369818 | G    | A   | RPL23AP7   | 4   | 3   | -          | -          | - | - | - | ncRNA    |
| 8  | 73984036  | 73984036  | G    | C   | SBSPOP     | 100 | 10  | -          | -          | - | - | - | nsSNV    |
| 11 | 62189812  | 62189812  | G    | A   | SCGB1A1    | 126 | 8   | -          | -          | - | - | - | nsSNV    |
| 2  | 165950946 | 165950946 | A    | T   | SCN3A      | 141 | 7   | -          | -          | - | - | O | nsSNV    |
| 6  | 76412647  | 76412647  | T    | C   | SENP6      | 138 | 17  | -          | -          | - | - | - | nsSNV    |
| 2  | 180008480 | 180008480 | C    | T   | SESTD1     | 74  | 8   | -          | -          | - | - | O | nsSNV    |
| 19 | 51170416  | 51170416  | G    | A   | SHANK1     | 51  | 6   | -          | -          | - | - | - | nsSNV    |
| 19 | 51918521  | 51918521  | A    | C   | SIGLEC10   | 73  | 6   | -          | -          | - | - | - | nsSNV    |
| 20 | 37356934  | 37356934  | C    | T   | SLC32A1    | 218 | 20  | -          | -          | - | - | - | sSNV     |
| 6  | 118635218 | 118635218 | T    | G   | SLC35F1    | 414 | 18  | -          | -          | - | - | - | nsSNV    |
| 15 | 67482790  | 67482790  | G    | A   | SMAD3      | 56  | 5   | -          | -          | - | - | - | sSNV     |
| 17 | 61910454  | 61910454  | G    | T   | SMARCD2    | 76  | 19  | -          | -          | - | - | - | nsSNV    |
| 2  | 1168851   | 1168851   | C    | T   | SNTG2      | 62  | 5   | -          | -          | - | - | - | sSNV     |
| 8  | 48641564  | 48641564  | C    | A   | SPIDR      | 51  | 5   | -          | -          | - | - | - | sSNV     |
| X  | 138529572 | 138529572 | A    | T   | SRD5A1P1   | 28  | 3   | -          | -          | - | - | - | ncRNA    |
| 4  | 119979077 | 119979078 | AC   | A   | SYNPO2     | 193 | 12  | -          | -          | - | - | - | FS del   |
| X  | 100531469 | 100531472 | CATT | C   | TAFL7L     | 265 | 36  | -          | -          | - | - | - | IF del   |
| 12 | 6566795   | 6566795   | C    | T   | TAPBPL     | 211 | 10  | -          | -          | - | - | - | sSNV     |
| 19 | 3600211   | 3600211   | G    | A   | TBXA2R     | 14  | 6   | -          | -          | - | - | - | nsSNV    |
| 14 | 24725214  | 24725214  | G    | A   | TGM1       | 116 | 6   | -          | -          | - | - | - | nsSNV    |
| 15 | 39885852  | 39885852  | G    | A   | THBS1      | 40  | 3   | -          | -          | - | - | - | nsSNV    |
| 15 | 63054504  | 63054504  | G    | A   | TLN2       | 481 | 42  | -          | -          | - | - | - | nsSNV    |
| 22 | 22314781  | 22314781  | G    | C   | TOP3B      | 35  | 3   | -          | -          | - | - | - | nsSNV    |
| 17 | 7579592   | 7579592   | T    | C   | TP53       | 60  | 23  | -          | -          | O | O | O | splicing |
| 22 | 20100239  | 20100239  | C    | T   | TRMT2A     | 72  | 7   | -          | -          | - | - | - | sSNV     |
| 9  | 131073180 | 131073180 | G    | A   | TRUB2      | 317 | 38  | -          | -          | - | - | - | nsSNV    |
| 2  | 179453333 | 179453333 | G    | T   | TTN        | 127 | 18  | -          | -          | - | - | - | nsSNV    |
| 2  | 179589251 | 179589251 | C    | A   | TTN        | 49  | 5   | -          | -          | - | - | - | nsSNV    |
| 19 | 4944397   | 4944397   | C    | T   | UHRF1      | 193 | 71  | -          | -          | - | - | - | UN       |
| 19 | 17751431  | 17751431  | C    | T   | UNC13A     | 53  | 10  | -          | -          | - | - | - | sSNV     |
| 17 | 5037195   | 5037195   | G    | A   | USP6       | 114 | 6   | rs74900103 | rs74900103 | O | - | - | nsSNV    |
| X  | 65252418  | 65252418  | A    | T   | VSIG4      | 62  | 5   | -          | -          | - | - | - | nsSNV    |
| 12 | 6161801   | 6161801   | C    | T   | VWF        | 190 | 11  | -          | -          | - | - | - | sSNV     |
| 12 | 863316    | 863316    | G    | A   | WNK1       | 101 | 13  | -          | -          | - | - | - | sSNV     |
| 3  | 55508509  | 55508509  | G    | A   | WNT5A      | 53  | 4   | -          | -          | - | - | - | sSNV     |
| 14 | 77605591  | 77605591  | G    | A   | ZDHHC22    | 60  | 21  | -          | -          | - | - | - | nsSNV    |
| 5  | 180277628 | 180277628 | G    | A   | ZFP62      | 340 | 47  | -          | -          | - | - | - | sSNV     |
| 6  | 87964581  | 87964581  | C    | A   | ZNF292     | 388 | 62  | -          | -          | - | - | O | nsSNV    |
| 19 | 21992579  | 21992579  | C    | G   | ZNF43      | 89  | 11  | -          | -          | - | - | - | nsSNV    |
| 1  | 182026125 | 182026125 | C    | T   | ZNF648     | 224 | 34  | -          | -          | - | - | - | nsSNV    |

\*NonFlagged: dbSNP files subtracting Flagged dbSNP entries. Flagged SNPs include SNPs < 1% minor allele frequency (MAF) (or unknown), mapping only once to reference assembly, flagged in dbSnp as "clinically associated".

\*\*nsSNV: non-synonymous SNV, sSNV: synonymous SNV, FS ins: frameshift insertion, FS del: frameshift deletion, IF ins: in-frame insertion, IF del: in-frame deletion, ncRNA: non-coding RNA, UN: Unknown. transcript maps to multiple locations, all as "coding transcripts", but none has a complete ORF.

**Table S3. Processed WES data**

**(D) AYA06**

| Chr | Start     | End       | Ref       | Alt      | Altered gene | T_Ref | T_Alt | dbSNP138    |             | CVE list |   |   | Mutation context** |
|-----|-----------|-----------|-----------|----------|--------------|-------|-------|-------------|-------------|----------|---|---|--------------------|
|     |           |           |           |          |              |       |       | All         | NonFlagged* | C        | V | E |                    |
| 13  | 25745349  | 25745349  | G         | GC       | AMER2        | 95    | 8     | -           | -           | -        | - | - | FS ins             |
| 9   | 95599345  | 95599345  | G         | GA       | ANKRD19P     | 6     | 7     | -           | -           | -        | - | - | ncRNA              |
| 13  | 70713509  | 70713509  | A         | ACTG     | ATXN8OS      | 27    | 7     | -           | -           | -        | - | - | ncRNA              |
| 19  | 51892382  | 51892382  | G         | GC       | C19orf84     | 186   | 16    | -           | -           | -        | - | - | FS ins             |
| 18  | 20716014  | 20716023  | GGGCGCCG  | G        | CABLES1      | 15    | 9     | -           | -           | -        | - | - | IF del             |
| 6   | 7389434   | 7389434   | C         | T        | CAGE1        | 126   | 6     | -           | -           | -        | - | - | splicing           |
| 7   | 93055822  | 93055822  | C         | T        | CALCR        | 297   | 11    | -           | -           | -        | - | - | nsSNV              |
| 8   | 82644888  | 82644888  | A         | AG       | CHMP4C       | 188   | 10    | -           | -           | -        | - | - | FS ins             |
| 22  | 37769495  | 37769495  | T         | TC       | ELFN2        | 80    | 6     | -           | -           | -        | - | - | FS ins             |
| 17  | 71205858  | 71205861  | ATGC      | A        | FAM104A      | 102   | 6     | -           | -           | -        | - | - | IF del             |
| 17  | 18682505  | 18682505  | T         | C        | FBXW10       | 32    | 4     | rs1024657   | rs1024657   | -        | - | - | nsSNV              |
| 4   | 153896047 | 153896047 | A         | AC       | FHDC1        | 97    | 7     | -           | -           | -        | - | - | FS ins             |
| 1   | 152285137 | 152285137 | G         | T        | FLG          | 104   | 5     | rs3120654   | rs3120654   | -        | - | - | nsSNV              |
| 15  | 30905994  | 30905994  | G         | A        | GOLGA8H      | 36    | 5     | rs4042347   | rs199794386 | -        | - | - | nsSNV              |
| 1   | 13183492  | 13183492  | T         | C        | HNRNPCL2     | 11    | 4     | -           | -           | -        | - | - | sSNV               |
| 2   | 170374777 | 170374777 | G         | A        | KLHL41       | 59    | 4     | -           | -           | -        | - | - | nsSNV              |
| 12  | 25398281  | 25398281  | C         | T        | KRAS         | 128   | 10    | rs112445441 | -           | O        | O | O | nsSNV              |
| 17  | 39305775  | 39305775  | T         | TGGCAGCA | KRTAP4-5     | 29    | 14    | -           | -           | -        | - | O | IF ins             |
| 17  | 39346595  | 39346595  | T         | TA       | KRTAP9-1     | 155   | 13    | -           | -           | -        | - | - | FS ins             |
| 15  | 90320134  | 90320146  | AGGGCAGGA | A        | MESP2        | 3     | 21    | -           | -           | -        | - | - | IF del             |
| 3   | 196733535 | 196733535 | C         | CG       | MFI2         | 77    | 7     | -           | -           | -        | - | - | FS ins             |
| 5   | 79950724  | 79950724  | G         | C        | MSH3         | 45    | 5     | rs2001675   | rs2001675   | -        | - | - | nsSNV              |
| 11  | 55579145  | 55579145  | C         | T        | OR5L1        | 31    | 3     | -           | -           | -        | - | - | nsSNV              |
| 1   | 158532510 | 158532510 | C         | A        | OR6P1        | 304   | 10    | -           | -           | -        | - | - | nsSNV              |
| 19  | 7607678   | 7607678   | C         | T        | PNPLA6       | 125   | 5     | -           | -           | -        | - | - | nsSNV              |
| 1   | 79002163  | 79002163  | C         | T        | PTGFR        | 238   | 8     | -           | -           | -        | - | - | nonsense           |
| 1   | 64605927  | 64605927  | G         | A        | ROR1         | 472   | 13    | -           | -           | -        | - | - | nsSNV              |
| 19  | 39923952  | 39923952  | G         | A        | RPS16        | 29    | 3     | -           | -           | -        | - | - | sSNV               |
| 12  | 123005948 | 123005948 | C         | T        | RSRC2        | 193   | 7     | -           | -           | -        | - | - | nsSNV              |
| 21  | 36410869  | 36410871  | CCT       | C        | RUNX1-IT1    | 42    | 10    | -           | -           | -        | - | - | ncRNA              |
| 12  | 109017650 | 109017680 | GGAGTGGT  | G        | SELPLG       | 272   | 85    | -           | -           | -        | - | - | IF del             |
| 21  | 34927468  | 34927468  | C         | G        | SON          | 40    | 6     | -           | -           | -        | - | - | sSNV               |
| 18  | 12449779  | 12449779  | G         | A        | SPIRE1       | 340   | 11    | -           | -           | -        | - | - | nsSNV              |
| 12  | 22354743  | 22354743  | G         | A        | ST8SIA1      | 284   | 9     | -           | -           | -        | - | - | nsSNV              |
| 9   | 113137744 | 113137745 | CT        | C        | SVEP1        | 46    | 6     | -           | -           | -        | - | - | splicing           |
| 15  | 90118864  | 90118864  | G         | GC       | TICRR        | 117   | 9     | -           | -           | -        | - | - | FS ins             |
| X   | 73045808  | 73045808  | G         | A        | TSIX,XIST    | 182   | 10    | -           | -           | -        | - | - | ncRNA              |
| 17  | 5037195   | 5037195   | G         | A        | USP6         | 67    | 6     | rs74900103  | rs74900103  | O        | - | - | nsSNV              |
| 8   | 146201230 | 146201233 | TACA      | T        | ZNF252P      | 91    | 6     | -           | -           | -        | - | - | ncRNA              |
| 19  | 58600100  | 58600100  | T         | TGG      | ZSCAN18      | 121   | 10    | -           | -           | -        | - | - | FS ins             |

\*NonFlagged: dbSNP files subtracting Flagged dbSNP entries. Flagged SNPs include SNPs < 1% minor allele frequency (MAF) (or unknown), mapping only once to reference assembly, flagged in dbSnp as "clinically associated".

\*\*nsSNV: non-synonymous SNV, sSNV: synonymous SNV, FS ins: frameshift insertion, FS del: frameshift deletion, IF ins: in-frame insertion, IF del: in-frame deletion, ncRNA: non-coding RNA, UN: Unknown. transcript maps to multiple locations, all as "coding transcripts", but none has a complete ORF.

Table S3. Processed WES data

## (E) AYA07

| Chr | Start     | End       | Ref | Alt | Altered gene | T_Ref | T_Alt | dbSNP138    |             | CVE list |   |   | Mutation context** |
|-----|-----------|-----------|-----|-----|--------------|-------|-------|-------------|-------------|----------|---|---|--------------------|
|     |           |           |     |     |              |       |       | All         | NonFlagged* | C        | V | E |                    |
| 19  | 58864015  | 58864015  | G   | A   | A1BG-AS1     | 17    | 4     | -           | -           | -        | - | - | ncRNA              |
| 2   | 169791885 | 169791885 | C   | T   | ABCB11       | 36    | 25    | -           | -           | -        | - | - | sSNV               |
| 16  | 16282712  | 16282712  | G   | T   | ABCC6        | 25    | 4     | -           | -           | -        | - | - | sSNV               |
| 3   | 100566447 | 100566447 | C   | A   | ABI3BP       | 133   | 5     | -           | -           | -        | - | - | sSNV               |
| 17  | 61559009  | 61559009  | G   | T   | ACE          | 73    | 5     | -           | -           | -        | - | - | nsSNV              |
| 17  | 61559937  | 61559937  | G   | T   | ACE          | 124   | 7     | -           | -           | -        | - | - | nsSNV              |
| 17  | 61568684  | 61568684  | G   | T   | ACE          | 32    | 4     | -           | -           | -        | - | - | nsSNV              |
| 11  | 76709805  | 76709805  | A   | T   | ACER3        | 101   | 40    | -           | -           | -        | - | - | splicing           |
| 11  | 76709806  | 76709806  | G   | T   | ACER3        | 102   | 39    | -           | -           | -        | - | - | splicing           |
| 1   | 120436968 | 120436968 | C   | A   | ADAM30       | 93    | 5     | -           | -           | -        | - | - | sSNV               |
| 5   | 33549374  | 33549374  | G   | T   | ADAMTS12     | 121   | 8     | rs77581578  | rs77581578  | -        | - | - | nsSNV              |
| 5   | 33891883  | 33891883  | C   | A   | ADAMTS12     | 69    | 5     | -           | -           | -        | - | - | nsSNV              |
| 9   | 18906820  | 18906820  | C   | A   | ADAMTSL1     | 40    | 5     | -           | -           | -        | - | - | nsSNV              |
| 9   | 136402633 | 136402633 | G   | T   | ADAMTSL2     | 39    | 4     | -           | -           | -        | - | - | nsSNV              |
| 6   | 147136309 | 147136309 | C   | A   | ADGB         | 60    | 5     | -           | -           | -        | - | - | nsSNV              |
| 4   | 100232023 | 100232023 | A   | T   | ADH1B        | 162   | 38    | -           | -           | -        | - | - | sSNV               |
| 8   | 26721911  | 26721911  | G   | A   | ADRA1A       | 20    | 22    | -           | -           | -        | - | - | sSNV               |
| 2   | 236957852 | 236957852 | G   | T   | AGAP1        | 59    | 5     | -           | -           | -        | - | - | nsSNV              |
| 12  | 58130904  | 58130904  | C   | A   | AGAP2        | 37    | 3     | -           | -           | -        | - | - | nsSNV              |
| 6   | 151670599 | 151670599 | C   | A   | AKAP12       | 28    | 4     | -           | -           | -        | - | - | nsSNV              |
| 15  | 86287887  | 86287887  | G   | T   | AKAP13       | 46    | 4     | -           | -           | -        | - | - | nsSNV              |
| 19  | 15484021  | 15484021  | C   | A   | AKAP8        | 61    | 5     | -           | -           | -        | - | - | nsSNV              |
| 9   | 117118302 | 117118302 | G   | T   | AKNA         | 65    | 5     | -           | -           | -        | - | - | sSNV               |
| 11  | 77832169  | 77832169  | C   | G   | ALG8         | 226   | 74    | -           | -           | -        | - | - | nsSNV              |
| 19  | 36501574  | 36501574  | G   | A   | ALKBH6       | 135   | 53    | -           | -           | -        | - | - | sSNV               |
| 1   | 21887134  | 21887134  | C   | A   | ALPL         | 55    | 5     | -           | -           | -        | - | - | nsSNV              |
| 3   | 46718456  | 46718456  | G   | T   | ALS2CL       | 63    | 5     | -           | -           | -        | - | - | nsSNV              |
| 12  | 31850856  | 31850856  | G   | T   | AMN1         | 201   | 8     | -           | -           | -        | - | - | nsSNV              |
| 12  | 31841951  | 31841951  | G   | T   | AMN1         | 137   | 7     | -           | -           | -        | - | - | sSNV               |
| 11  | 113270241 | 113270241 | G   | T   | ANKK1        | 64    | 6     | -           | -           | -        | - | - | nsSNV              |
| 5   | 72851348  | 72851348  | C   | A   | ANKRA2       | 149   | 7     | -           | -           | -        | - | - | nsSNV              |
| 16  | 89354947  | 89354947  | C   | A   | ANKRD11      | 79    | 5     | -           | -           | -        | - | - | nsSNV              |
| 19  | 33095298  | 33095298  | C   | A   | ANKRD27      | 80    | 5     | -           | -           | -        | - | - | nsSNV              |
| 5   | 79855084  | 79855084  | G   | A   | ANKRD34B     | 42    | 16    | -           | -           | -        | - | - | nsSNV              |
| 15  | 40574762  | 40574762  | G   | T   | ANKRD63      | 37    | 4     | -           | -           | -        | - | - | nsSNV              |
| 8   | 124748071 | 124748071 | C   | A   | ANXA13       | 57    | 5     | -           | -           | -        | - | - | nsSNV              |
| 16  | 71766978  | 71766978  | G   | T   | AP1G1        | 39    | 4     | -           | -           | -        | - | - | nsSNV              |
| 1   | 114440492 | 114440492 | G   | T   | AP4B1        | 66    | 5     | -           | -           | -        | - | - | sSNV               |
| 14  | 20924871  | 20924871  | C   | CA  | APEX1        | 55    | 34    | -           | -           | -        | - | - | FS ins             |
| 19  | 36365496  | 36365496  | C   | A   | APLP1        | 69    | 6     | -           | -           | -        | - | - | nsSNV              |
| 14  | 75140777  | 75140777  | G   | T   | AREL1        | 69    | 5     | rs17853116  | rs17853116  | -        | - | - | nsSNV              |
| 20  | 47641993  | 47641993  | G   | A   | ARFGF2       | 96    | 27    | -           | -           | -        | - | - | sSNV               |
| 17  | 12887975  | 12887975  | C   | A   | ARHGAP44     | 83    | 5     | -           | -           | -        | - | - | sSNV               |
| 1   | 17930026  | 17930026  | C   | A   | ARHGEF10L    | 39    | 4     | -           | -           | -        | - | - | nsSNV              |
| 2   | 39185184  | 39185184  | G   | T   | ARHGEF33     | 56    | 17    | -           | -           | -        | - | O | nsSNV              |
| 2   | 39185185  | 39185185  | G   | T   | ARHGEF33     | 55    | 17    | -           | -           | -        | - | O | nsSNV              |
| 2   | 97217432  | 97217432  | G   | T   | ARID5A       | 25    | 4     | -           | -           | -        | - | - | nsSNV              |
| 6   | 109220994 | 109220994 | G   | T   | ARMC2        | 24    | 4     | -           | -           | -        | - | - | nsSNV              |
| 3   | 35778792  | 35778792  | C   | A   | ARPP21       | 36    | 4     | -           | -           | -        | - | - | nsSNV              |
| 14  | 104577930 | 104577930 | C   | A   | ASPG         | 24    | 4     | -           | -           | -        | - | - | nsSNV              |
| 8   | 124408451 | 124408451 | G   | T   | ATAD2        | 43    | 3     | -           | -           | -        | - | O | sSNV               |
| 14  | 96800086  | 96800086  | C   | A   | ATG2B        | 85    | 5     | -           | -           | -        | - | - | sSNV               |
| 6   | 106764022 | 106764022 | G   | A   | ATG5         | 83    | 10    | -           | -           | -        | - | O | nsSNV              |
| 5   | 160042911 | 160042911 | G   | T   | ATP10B       | 126   | 8     | -           | -           | -        | - | - | nsSNV              |
| 16  | 84459400  | 84459400  | G   | T   | ATP2C2       | 45    | 4     | -           | -           | -        | - | - | nsSNV              |
| 2   | 71185508  | 71185508  | G   | A   | ATP6V1B1     | 50    | 18    | -           | -           | -        | - | - | nsSNV              |
| 6   | 31514448  | 31514448  | C   | A   | ATP6V1G2-DDX | 303   | 14    | rs370511629 | rs370511629 | -        | - | - | ncRNA              |
| 13  | 52511698  | 52511698  | G   | T   | ATP7B        | 65    | 6     | -           | -           | -        | - | - | nsSNV              |
| 13  | 52516578  | 52516578  | G   | T   | ATP7B        | 29    | 4     | -           | -           | -        | - | - | nsSNV              |
| 10  | 116853763 | 116853763 | G   | T   | ATRNL1       | 40    | 4     | -           | -           | -        | - | - | nsSNV              |
| 7   | 70255271  | 70255271  | C   | A   | AUTS2        | 107   | 6     | -           | -           | -        | - | - | sSNV               |
| 19  | 41765733  | 41765733  | C   | A   | AXL          | 230   | 8     | -           | -           | -        | - | - | nsSNV              |
| 11  | 134251848 | 134251848 | G   | T   | B3GAT1       | 81    | 5     | -           | -           | -        | - | - | nsSNV              |













|    |           |           |     |    |         |     |    |   |   |   |   |   |   |          |
|----|-----------|-----------|-----|----|---------|-----|----|---|---|---|---|---|---|----------|
| 14 | 52473306  | 52473306  | G   | T  | NID2    | 78  | 5  | - | - | - | - | - | - | nsSNV    |
| 15 | 23006250  | 23006250  | G   | T  | NIPA2   | 43  | 4  | - | - | - | - | - | - | sSNV     |
| 8  | 23540374  | 23540374  | C   | A  | NKX3-1  | 43  | 5  | - | - | - | - | - | - | nsSNV    |
| 17 | 7319276   | 7319276   | G   | T  | NLGN2   | 128 | 7  | - | - | - | - | - | - | nsSNV    |
| X  | 6069396   | 6069396   | G   | T  | NLGN4X  | 86  | 5  | - | - | - | - | - | - | nsSNV    |
| 19 | 56220344  | 56220344  | G   | T  | NLRP9   | 87  | 5  | - | - | - | - | - | - | sSNV     |
| 11 | 119052907 | 119052907 | G   | T  | NLRX1   | 83  | 6  | - | - | - | - | - | - | nsSNV    |
| 7  | 150711126 | 150711126 | G   | T  | NOS3    | 93  | 5  | - | - | - | - | - | - | nsSNV    |
| X  | 100118486 | 100118486 | C   | A  | NOX1    | 37  | 4  | - | - | - | - | - | - | nsSNV    |
| 11 | 66192488  | 66192488  | C   | A  | NPAS4   | 109 | 6  | - | - | - | - | - | - | sSNV     |
| 3  | 132419238 | 132419238 | C   | A  | NPHP3   | 87  | 5  | - | - | - | - | - | - | sSNV     |
| 7  | 98256544  | 98256544  | G   | T  | NPTX2   | 43  | 3  | - | - | - | - | - | - | nsSNV    |
| 22 | 39239513  | 39239513  | C   | A  | NPTXR   | 18  | 3  | - | - | - | - | - | - | sSNV     |
| 16 | 67920001  | 67920003  | ACT | A  | NRN1L   | 97  | 63 | - | - | - | - | - | - | FS del   |
| 11 | 64428417  | 64428417  | C   | A  | NRXN2   | 95  | 5  | - | - | - | - | - | - | nsSNV    |
| 10 | 104859696 | 104859696 | C   | A  | NT5C2   | 106 | 7  | - | - | O | - | - | - | nsSNV    |
| 12 | 104179244 | 104179244 | G   | T  | NT5DC3  | 60  | 5  | - | - | - | - | - | - | nsSNV    |
| 11 | 120097672 | 120097672 | C   | A  | OAF     | 163 | 8  | - | - | - | - | - | - | nsSNV    |
| 15 | 76019739  | 76019739  | C   | A  | ODF3L1  | 77  | 5  | - | - | - | - | - | - | nsSNV    |
| 3  | 9791994   | 9791994   | C   | A  | OGG1    | 105 | 6  | - | - | - | - | - | - | sSNV     |
| 11 | 132812898 | 132812898 | G   | T  | OPCML   | 30  | 3  | - | - | - | - | - | - | sSNV     |
| 12 | 48596213  | 48596213  | G   | T  | OR10AD1 | 76  | 5  | - | - | - | - | - | - | nsSNV    |
| 11 | 123908858 | 123908858 | G   | T  | OR10G7  | 95  | 5  | - | - | - | - | - | - | nsSNV    |
| 11 | 48346563  | 48346563  | C   | A  | OR4C3   | 122 | 53 | - | - | - | - | - | - | nsSNV    |
| 3  | 97869022  | 97869022  | C   | A  | OR5H14  | 30  | 5  | - | - | - | - | - | - | nsSNV    |
| 7  | 142750049 | 142750049 | T   | G  | OR6V1   | 622 | 18 | - | - | - | - | - | - | nsSNV    |
| 11 | 124180053 | 124180053 | C   | T  | OR8D1   | 41  | 17 | - | - | - | - | - | - | nsSNV    |
| 11 | 55904809  | 55904809  | G   | T  | OR8J3   | 104 | 6  | - | - | - | - | - | - | nsSNV    |
| 12 | 48920257  | 48920257  | C   | A  | OR8S1   | 215 | 8  | - | - | - | - | - | - | sSNV     |
| 12 | 58114219  | 58114219  | G   | T  | OS9     | 43  | 4  | - | - | - | - | - | - | nsSNV    |
| 3  | 161221576 | 161221576 | C   | T  | OTOL1   | 15  | 5  | - | - | - | - | - | - | nsSNV    |
| 12 | 56726729  | 56726729  | G   | T  | PAN2    | 72  | 4  | - | - | - | - | - | - | sSNV     |
| 16 | 50188133  | 50188133  | C   | A  | PAPD5   | 38  | 4  | - | - | - | - | - | - | nsSNV    |
| 19 | 39589134  | 39589134  | G   | T  | PAPL    | 86  | 5  | - | - | - | - | - | - | nsSNV    |
| 14 | 73733234  | 73733234  | C   | A  | PAPLN   | 44  | 4  | - | - | - | - | - | - | nsSNV    |
| 14 | 97000899  | 97000899  | G   | T  | PAPOLA  | 142 | 6  | - | - | - | - | - | - | nsSNV    |
| 20 | 49366736  | 49366736  | C   | A  | PAR6B   | 142 | 7  | - | - | - | - | - | - | nsSNV    |
| 3  | 122259629 | 122259629 | C   | A  | PARP9   | 159 | 7  | - | - | - | - | - | - | nsSNV    |
| 2  | 223066881 | 223066881 | C   | A  | PAX3    | 46  | 4  | - | - | O | - | - | - | nsSNV    |
| 3  | 52643508  | 52643508  | C   | A  | PBRM1   | 144 | 7  | - | - | O | O | O | - | nsSNV    |
| 11 | 66638627  | 66638627  | G   | T  | PC      | 102 | 6  | - | - | - | - | - | - | nsSNV    |
| 3  | 51993966  | 51993966  | C   | A  | PCBP4   | 40  | 4  | - | - | - | - | - | - | nsSNV    |
| 4  | 30724727  | 30724727  | C   | G  | PCDH7   | 51  | 12 | - | - | - | - | - | O | nsSNV    |
| 5  | 140209865 | 140209865 | G   | T  | PCDHA6  | 56  | 20 | - | - | - | - | - | - | nsSNV    |
| 5  | 140558897 | 140558897 | G   | T  | PCDHB8  | 200 | 8  | - | - | - | - | - | - | nsSNV    |
| 5  | 140711946 | 140711946 | C   | A  | PCDHGA1 | 68  | 5  | - | - | - | - | - | - | sSNV     |
| 20 | 17446037  | 17446037  | C   | T  | PCSK2   | 256 | 24 | - | - | - | - | - | - | sSNV     |
| 19 | 1487169   | 1487169   | G   | T  | PCSK4   | 45  | 4  | - | - | - | - | - | - | nsSNV    |
| 5  | 149498364 | 149498364 | G   | T  | PDGFRB  | 151 | 7  | - | - | O | - | - | - | sSNV     |
| 12 | 48535726  | 48535726  | G   | T  | PFKM    | 188 | 11 | - | - | - | - | - | - | nsSNV    |
| 3  | 169896685 | 169896685 | G   | T  | PHC3    | 106 | 9  | - | - | - | - | - | - | nsSNV    |
| 1  | 6680129   | 6680129   | G   | T  | PHF13   | 38  | 4  | - | - | - | - | - | - | nsSNV    |
| 18 | 60630608  | 60630608  | C   | A  | PHLPP1  | 4   | 3  | - | - | - | - | - | - | nsSNV    |
| 13 | 73409508  | 73409508  | T   | TA | PIBF1   | 1   | 9  | - | - | - | - | - | - | splicing |
| 3  | 138403499 | 138403499 | G   | T  | PIK3CB  | 98  | 6  | - | - | - | - | - | O | sSNV     |
| 1  | 46543247  | 46543247  | C   | T  | PIK3R3  | 42  | 24 | - | - | - | - | - | - | nsSNV    |
| 19 | 40873657  | 40873657  | G   | T  | PLD3    | 81  | 4  | - | - | - | - | - | - | sSNV     |
| 8  | 144992582 | 144992582 | G   | T  | PLEC    | 35  | 4  | - | - | - | - | - | - | nsSNV    |
| 8  | 144997967 | 144997967 | G   | T  | PLEC    | 89  | 5  | - | - | - | - | - | - | nsSNV    |
| 3  | 126746882 | 126746882 | C   | A  | PLXNA1  | 148 | 7  | - | - | - | - | - | - | nsSNV    |
| 1  | 208255771 | 208255771 | G   | T  | PLXNA2  | 98  | 6  | - | - | - | - | - | - | nsSNV    |
| 3  | 48457835  | 48457835  | C   | A  | PLXNB1  | 21  | 3  | - | - | - | - | - | - | nsSNV    |
| 1  | 166819553 | 166819553 | A   | T  | POGK    | 50  | 36 | - | - | - | - | - | - | nsSNV    |
| 22 | 42981894  | 42981894  | G   | T  | POLDIP3 | 70  | 5  | - | - | - | - | - | - | nsSNV    |
| 12 | 133233739 | 133233739 | G   | T  | POLE    | 85  | 5  | - | - | - | - | - | O | nsSNV    |
| 15 | 89871948  | 89871948  | C   | A  | POLG    | 80  | 5  | - | - | - | - | - | - | nsSNV    |
| 3  | 121168195 | 121168195 | A   | C  | POLQ    | 74  | 27 | - | - | - | - | - | - | nsSNV    |
| 22 | 38363139  | 38363139  | G   | A  | POLR2F  | 13  | 13 | - | - | - | - | - | - | sSNV     |

|    |           |           |   |   |               |     |    |             |             |   |   |   |   |       |
|----|-----------|-----------|---|---|---------------|-----|----|-------------|-------------|---|---|---|---|-------|
| 3  | 119378978 | 119378978 | C | A | POPC2         | 41  | 3  | -           | -           | - | - | - | - | nsSNV |
| 3  | 87325472  | 87325472  | T | A | POU1F1        | 17  | 8  | -           | -           | - | - | - | - | sSNV  |
| 6  | 99283522  | 99283522  | C | A | POU3F2        | 82  | 5  | -           | -           | - | - | - | - | nsSNV |
| 2  | 44436479  | 44436479  | C | G | PPM1B         | 93  | 38 | -           | -           | - | - | - | - | nsSNV |
| 11 | 61250211  | 61250211  | C | A | PPP1R32       | 12  | 4  | -           | -           | - | - | - | - | sSNV  |
| 12 | 108134927 | 108134927 | G | T | PRDM4         | 174 | 7  | -           | -           | - | - | - | - | nsSNV |
| X  | 23685907  | 23685907  | C | A | PRDX4         | 30  | 4  | -           | -           | - | - | - | - | nsSNV |
| 13 | 39586310  | 39586310  | C | A | PROSER1       | 26  | 3  | -           | -           | - | - | - | - | sSNV  |
| 20 | 62614440  | 62614440  | C | A | PRPF6         | 66  | 5  | -           | -           | - | - | - | - | nsSNV |
| 19 | 50098982  | 50098982  | G | T | PRR12         | 39  | 5  | -           | -           | - | - | - | - | nsSNV |
| 9  | 134305561 | 134305561 | G | T | PRRC2B        | 50  | 5  | -           | -           | - | - | - | - | nsSNV |
| 9  | 134351326 | 134351326 | C | A | PRRC2B        | 164 | 10 | -           | -           | - | - | - | - | sSNV  |
| 8  | 143763339 | 143763339 | G | A | PSCA          | 86  | 25 | rs376581990 | rs376581990 | - | - | - | - | nsSNV |
| 19 | 43237008  | 43237008  | C | T | PSG3          | 22  | 6  | -           | -           | - | - | - | - | nsSNV |
| 17 | 38151512  | 38151512  | C | A | PSMD3         | 125 | 6  | -           | -           | - | - | - | - | nsSNV |
| 9  | 130885257 | 130885257 | C | A | PTGES2        | 66  | 6  | -           | -           | - | - | - | - | nsSNV |
| 8  | 141678378 | 141678378 | G | T | PTK2          | 150 | 7  | -           | -           | - | - | - | - | nsSNV |
| 6  | 43109749  | 43109749  | G | A | PTK7          | 82  | 36 | -           | -           | - | - | - | - | nsSNV |
| 12 | 71139637  | 71139637  | G | T | PTPRR         | 94  | 6  | -           | -           | - | - | - | - | nsSNV |
| 3  | 191179074 | 191179074 | C | T | PYDC2         | 84  | 22 | -           | -           | - | - | - | - | sSNV  |
| 16 | 640372    | 640372    | G | T | RAB40C        | 44  | 4  | -           | -           | - | - | - | - | nsSNV |
| X  | 103080708 | 103080708 | C | A | RAB9B         | 35  | 4  | -           | -           | - | - | - | - | nsSNV |
| 20 | 20553610  | 20553610  | C | T | RALGAPA2      | 26  | 7  | -           | -           | - | - | - | - | nsSNV |
| 3  | 50150859  | 50150859  | G | T | RBM5          | 66  | 5  | -           | -           | - | - | - | - | nsSNV |
| 6  | 111696294 | 111696294 | G | T | REV3L         | 80  | 5  | -           | -           | - | - | - | - | sSNV  |
| 10 | 62648340  | 62648340  | C | A | RHOBTB1       | 186 | 7  | -           | -           | - | - | - | - | nsSNV |
| 14 | 93118367  | 93118367  | C | A | RIN3          | 86  | 5  | -           | -           | - | - | - | - | nsSNV |
| 1  | 40705314  | 40705314  | G | T | RLF           | 92  | 5  | -           | -           | - | - | - | - | nsSNV |
| 8  | 101270957 | 101270957 | G | T | RNF19A        | 95  | 6  | -           | -           | - | - | - | - | nsSNV |
| 14 | 24616983  | 24616983  | G | T | RNF31         | 30  | 3  | -           | -           | - | - | - | - | nsSNV |
| 2  | 89037502  | 89037502  | G | T | RPIA          | 32  | 4  | -           | -           | - | - | - | - | sSNV  |
| 18 | 47015879  | 47015879  | C | A | RPL17,RPL17-C | 26  | 4  | -           | -           | - | - | - | - | sSNV  |
| 19 | 12936690  | 12936690  | C | T | RTBDN         | 39  | 13 | -           | -           | - | - | - | - | nsSNV |
| 22 | 20229905  | 20229905  | C | A | RTN4R         | 85  | 28 | -           | -           | - | - | - | - | nsSNV |
| 9  | 91616420  | 91616420  | A | T | S1PR3         | 109 | 48 | -           | -           | - | - | - | - | nsSNV |
| 2  | 224463385 | 224463385 | C | A | SCG2          | 93  | 5  | -           | -           | - | - | - | - | nsSNV |
| 7  | 12675689  | 12675689  | C | A | SCIN          | 60  | 16 | -           | -           | - | - | - | - | sSNV  |
| 11 | 118014739 | 118014739 | G | T | SCN4B         | 90  | 6  | -           | -           | - | - | - | - | nsSNV |
| 2  | 167301483 | 167301483 | G | T | SCN7A         | 92  | 5  | -           | -           | - | - | - | - | nsSNV |
| 11 | 9090981   | 9090981   | C | A | SCUBE2        | 77  | 5  | -           | -           | - | - | - | - | nsSNV |
| 1  | 156146641 | 156146641 | G | T | SEMA4A        | 75  | 5  | -           | -           | - | - | - | - | sSNV  |
| 22 | 21138358  | 21138358  | G | T | SERPIND1      | 136 | 6  | -           | -           | - | - | - | - | nsSNV |
| 16 | 30991124  | 30991124  | C | A | SETD1A        | 35  | 4  | -           | -           | - | - | - | - | sSNV  |
| 3  | 47098785  | 47098785  | G | T | SETD2         | 128 | 6  | -           | -           | O | O | O | - | sSNV  |
| 1  | 150915493 | 150915493 | T | A | SETDB1        | 32  | 26 | -           | -           | - | - | - | - | nsSNV |
| 16 | 28884061  | 28884061  | C | A | SH2B1         | 45  | 4  | -           | -           | - | - | - | - | sSNV  |
| 19 | 51192455  | 51192455  | C | A | SHANK1        | 14  | 3  | -           | -           | - | - | - | - | nsSNV |
| 19 | 422156    | 422156    | G | T | SHC2          | 25  | 4  | -           | -           | - | - | - | - | nsSNV |
| 19 | 51920196  | 51920196  | G | T | SIGLEC10      | 44  | 5  | rs73049612  | rs73049612  | - | - | - | - | nsSNV |
| 19 | 51645659  | 51645659  | G | T | SIGLEC7       | 90  | 5  | -           | -           | - | - | - | - | nsSNV |
| 5  | 133502930 | 133502930 | C | A | SKP1          | 83  | 5  | -           | -           | - | - | - | - | nsSNV |
| 1  | 160718048 | 160718048 | C | A | SLAMF7        | 34  | 4  | -           | -           | - | - | - | - | sSNV  |
| 16 | 56906304  | 56906304  | C | A | SLC12A3       | 51  | 13 | -           | -           | - | - | - | - | sSNV  |
| 3  | 124826587 | 124826587 | C | A | SLC12A8       | 140 | 7  | -           | -           | - | - | - | - | nsSNV |
| 19 | 49933799  | 49933799  | G | A | SLC17A7       | 16  | 4  | -           | -           | - | - | - | - | nsSNV |
| 5  | 36680612  | 36680612  | C | A | SLC1A3        | 169 | 8  | -           | -           | - | - | - | - | nsSNV |
| 11 | 64329527  | 64329527  | G | T | SLC22A11      | 82  | 5  | -           | -           | - | - | - | - | sSNV  |
| 11 | 62763553  | 62763553  | C | A | SLC22A8       | 171 | 8  | -           | -           | - | - | - | - | nsSNV |
| 7  | 87488025  | 87488025  | C | A | SLC25A40      | 107 | 6  | -           | -           | - | - | - | - | nsSNV |
| 8  | 92378848  | 92378848  | C | A | SLC26A7       | 83  | 5  | -           | -           | - | - | - | - | nsSNV |
| 15 | 45560541  | 45560541  | G | A | SLC28A2       | 31  | 10 | -           | -           | - | - | - | - | nsSNV |
| 10 | 73111419  | 73111419  | C | A | SLC29A3       | 39  | 4  | -           | -           | - | - | - | - | nsSNV |
| 6  | 44222724  | 44222724  | G | T | SLC35B2       | 70  | 5  | -           | -           | - | - | - | - | nsSNV |
| 17 | 42335094  | 42335094  | C | A | SLC4A1        | 38  | 4  | -           | -           | - | - | - | - | nsSNV |
| 20 | 3211679   | 3211679   | C | A | SLC4A11       | 81  | 6  | -           | -           | - | - | - | - | sSNV  |
| 3  | 27453191  | 27453191  | C | T | SLC4A7        | 46  | 15 | rs150040978 | rs150040978 | - | - | - | - | nsSNV |
| 8  | 145584265 | 145584265 | G | T | SLC52A2       | 90  | 5  | -           | -           | - | - | - | - | sSNV  |
| 5  | 149578908 | 149578908 | G | T | SLC6A7        | 131 | 7  | -           | -           | - | - | - | - | nsSNV |

|    |           |           |          |   |              |     |    |   |   |   |   |   |   |          |
|----|-----------|-----------|----------|---|--------------|-----|----|---|---|---|---|---|---|----------|
| 12 | 21427436  | 21427436  | C        | A | SLCO1A2      | 159 | 7  | - | - | - | - | - | - | nsSNV    |
| 4  | 20490610  | 20490610  | G        | T | SLIT2        | 33  | 4  | - | - | - | - | - | - | nsSNV    |
| 10 | 105762531 | 105762531 | G        | T | SLK          | 58  | 5  | - | - | - | - | - | - | nsSNV    |
| 20 | 57610099  | 57610099  | C        | T | SLMO2        | 20  | 12 | - | - | - | - | - | - | nsSNV    |
| 19 | 11129675  | 11129675  | C        | A | SMARCA4      | 80  | 5  | - | - | O | O | O | - | sSNV     |
| 4  | 90756714  | 90756714  | C        | A | SNCA         | 40  | 4  | - | - | - | - | - | - | nsSNV    |
| 18 | 67992266  | 67992266  | C        | A | SOCS6        | 24  | 3  | - | - | - | - | - | - | nsSNV    |
| 2  | 171573149 | 171573149 | C        | A | SP5          | 50  | 4  | - | - | - | - | - | - | sSNV     |
| 13 | 24825897  | 24825897  | C        | A | SPATA13      | 81  | 6  | - | - | - | - | - | - | sSNV     |
| 6  | 44320494  | 44320494  | G        | T | SPATS1       | 139 | 6  | - | - | - | - | - | - | nsSNV    |
| 1  | 16254813  | 16254813  | G        | T | SPEN         | 84  | 5  | - | - | - | - | - | O | nsSNV    |
| 1  | 16254891  | 16254891  | G        | A | SPEN         | 61  | 39 | - | - | - | - | - | O | nsSNV    |
| 5  | 136320830 | 136320830 | C        | A | SPOCK1       | 109 | 6  | - | - | - | - | - | - | nsSNV    |
| 17 | 43923312  | 43923312  | G        | T | SPPL2C       | 115 | 6  | - | - | - | - | - | - | nsSNV    |
| 14 | 65239344  | 65239344  | C        | A | SPTB         | 34  | 4  | - | - | - | - | - | - | nsSNV    |
| 14 | 65239665  | 65239665  | C        | A | SPTB         | 76  | 4  | - | - | - | - | - | - | nsSNV    |
| 16 | 30724921  | 30724921  | C        | A | SRCAP        | 82  | 5  | - | - | - | - | - | - | sSNV     |
| 7  | 104766715 | 104766715 | C        | A | SRPK2        | 24  | 3  | - | - | - | - | - | - | nsSNV    |
| 22 | 26879946  | 26879967  | GGAGGCGG | G | SRRD         | 69  | 27 | - | - | - | - | - | - | IF del   |
| 22 | 37603027  | 37603027  | G        | T | SSTR3        | 80  | 5  | - | - | - | - | - | - | sSNV     |
| 1  | 44303930  | 44303930  | G        | A | ST3GAL3      | 156 | 62 | - | - | - | - | - | - | sSNV     |
| 7  | 116862001 | 116862001 | C        | A | ST7          | 35  | 4  | - | - | - | - | - | - | nsSNV    |
| 8  | 74351277  | 74351277  | G        | T | STAU2-AS1    | 194 | 8  | - | - | - | - | - | - | ncRNA    |
| X  | 7177590   | 7177590   | C        | A | STS          | 84  | 5  | - | - | - | - | - | - | nsSNV    |
| 20 | 57290463  | 57290463  | C        | A | STX16-NPEPL1 | 129 | 6  | - | - | - | - | - | - | ncRNA    |
| 16 | 28603371  | 28603371  | A        | G | SULT1A2      | 15  | 9  | - | - | - | - | - | - | nsSNV    |
| 16 | 28603372  | 28603372  | G        | T | SULT1A2      | 14  | 9  | - | - | - | - | - | - | nsSNV    |
| 10 | 70968510  | 70968510  | G        | T | SUPV3L1      | 134 | 7  | - | - | - | - | - | - | nsSNV    |
| 9  | 93636492  | 93636492  | C        | A | SYK          | 116 | 6  | - | - | O | - | - | - | nsSNV    |
| 9  | 93641094  | 93641094  | G        | T | SYK          | 91  | 5  | - | - | O | - | - | - | nsSNV    |
| 14 | 74876409  | 74876409  | G        | T | SYNDIG1L     | 17  | 4  | - | - | - | - | - | - | sSNV     |
| 14 | 64678695  | 64678695  | G        | T | SYNE2        | 88  | 5  | - | - | - | - | - | - | nsSNV    |
| 4  | 119948372 | 119948372 | G        | T | SYNPO2       | 62  | 5  | - | - | - | - | - | - | nsSNV    |
| 1  | 43896734  | 43896734  | C        | A | SZT2         | 71  | 6  | - | - | - | - | - | - | nsSNV    |
| 4  | 1729975   | 1729975   | C        | A | TACC3        | 19  | 3  | - | - | - | - | - | - | sSNV     |
| 16 | 30002820  | 30002820  | C        | A | TAOK2        | 15  | 4  | - | - | - | - | - | - | sSNV     |
| 1  | 234601455 | 234601456 | CT       | C | TARBP1       | 73  | 12 | - | - | - | - | - | - | splicing |
| 1  | 19180971  | 19180971  | G        | T | TAS1R2       | 76  | 5  | - | - | - | - | - | - | sSNV     |
| 19 | 50390826  | 50390826  | G        | T | TBC1D17      | 81  | 5  | - | - | - | - | - | - | nsSNV    |
| 11 | 12901388  | 12901388  | G        | T | TEAD1        | 8   | 3  | - | - | - | - | - | - | nsSNV    |
| 5  | 167674392 | 167674392 | C        | A | TENM2        | 101 | 6  | - | - | - | - | - | - | nsSNV    |
| 11 | 78440644  | 78440644  | C        | A | TENM4        | 38  | 4  | - | - | - | - | - | - | sSNV     |
| 6  | 10415107  | 10415107  | G        | A | TFAP2A-AS1   | 18  | 5  | - | - | - | - | - | - | ncRNA    |
| 1  | 92149414  | 92149414  | C        | A | TGFBR3       | 32  | 4  | - | - | - | - | - | - | nsSNV    |
| 15 | 71175212  | 71175212  | G        | T | THAP10       | 86  | 6  | - | - | - | - | - | - | sSNV     |
| 22 | 21354468  | 21354468  | G        | T | THAP7        | 39  | 4  | - | - | - | - | - | - | nsSNV    |
| X  | 122758005 | 122758005 | C        | A | THOC2        | 23  | 3  | - | - | - | - | - | - | nsSNV    |
| 16 | 3074360   | 3074360   | G        | T | THOC6        | 82  | 6  | - | - | - | - | - | - | sSNV     |
| 2  | 138329991 | 138329991 | G        | T | THSD7B       | 91  | 4  | - | - | - | - | - | - | UN       |
| 8  | 144681483 | 144681483 | G        | T | TIGD5        | 92  | 5  | - | - | - | - | - | - | sSNV     |
| 9  | 35708418  | 35708418  | G        | A | TLN1         | 3   | 8  | - | - | - | - | - | - | nsSNV    |
| 4  | 38798572  | 38798572  | G        | T | TLR1         | 89  | 5  | - | - | - | - | - | - | sSNV     |
| 20 | 2616601   | 2616601   | C        | G | TMC2         | 38  | 16 | - | - | - | - | - | - | nsSNV    |
| 17 | 76109255  | 76109255  | G        | A | TMC6         | 29  | 5  | - | - | - | - | - | - | sSNV     |
| 1  | 20009821  | 20009821  | G        | T | TMCO4        | 43  | 4  | - | - | - | - | - | - | sSNV     |
| 12 | 57457942  | 57457942  | C        | A | TMEM194A     | 68  | 5  | - | - | - | - | - | - | sSNV     |
| 9  | 140099861 | 140099861 | G        | T | TMEM203      | 27  | 4  | - | - | - | - | - | - | sSNV     |
| 1  | 212550933 | 212550933 | C        | A | TMEM206      | 118 | 6  | - | - | - | - | - | - | nsSNV    |
| 1  | 15443766  | 15443766  | G        | T | TMEM51-AS1   | 76  | 6  | - | - | - | - | - | - | ncRNA    |
| 1  | 16069533  | 16069533  | C        | A | TMEM82       | 36  | 3  | - | - | - | - | - | - | sSNV     |
| 15 | 52192437  | 52192437  | C        | A | TMOD3        | 53  | 29 | - | - | - | - | - | - | nsSNV    |
| 17 | 26671453  | 26671453  | C        | A | TNFAIP1      | 38  | 4  | - | - | - | - | - | - | nsSNV    |
| 17 | 18217952  | 18217952  | C        | A | TOP3A        | 25  | 5  | - | - | - | - | - | - | nsSNV    |
| 1  | 179815593 | 179815593 | C        | A | TOR1AIP2     | 79  | 5  | - | - | - | - | - | - | sSNV     |
| 9  | 123673617 | 123673617 | G        | T | TRAF1        | 12  | 3  | - | - | - | - | - | - | nsSNV    |
| 6  | 116821669 | 116821669 | C        | T | TRAPPC3L     | 25  | 5  | - | - | - | - | - | - | nsSNV    |
| 17 | 57141768  | 57141769  | TA       | T | TRIM37       | 43  | 7  | - | - | - | - | - | - | splicing |
| 3  | 160156679 | 160156679 | G        | T | TRIM59       | 94  | 6  | - | - | - | - | - | - | nsSNV    |

|    |           |           |      |   |         |     |    |             |             |   |   |   |   |          |
|----|-----------|-----------|------|---|---------|-----|----|-------------|-------------|---|---|---|---|----------|
| 11 | 8643262   | 8643262   | T    | A | TRIM66  | 49  | 25 | -           | -           | - | - | - | - | nsSNV    |
| 5  | 14507230  | 14507230  | G    | T | TRIO    | 75  | 5  | -           | -           | - | - | - | - | splicing |
| 20 | 5921750   | 5921750   | C    | A | TRMT6   | 58  | 5  | -           | -           | - | - | - | - | nsSNV    |
| 7  | 98562363  | 98562363  | C    | A | TRRAP   | 88  | 5  | -           | -           | - | - | - | - | nsSNV    |
| 7  | 98576461  | 98576461  | C    | A | TRRAP   | 46  | 5  | -           | -           | - | - | - | - | sSNV     |
| 7  | 100075040 | 100075040 | G    | T | TSC22D4 | 45  | 4  | -           | -           | - | - | - | - | sSNV     |
| 20 | 51872809  | 51872809  | C    | A | TSHZ2   | 199 | 9  | -           | -           | - | - | - | - | nsSNV    |
| 15 | 43044918  | 43044918  | C    | G | TTBK2   | 56  | 28 | -           | -           | - | - | - | - | nsSNV    |
| 3  | 180328173 | 180328173 | G    | T | TTC14   | 38  | 5  | -           | -           | - | - | - | - | nsSNV    |
| 17 | 40094865  | 40094865  | G    | T | TTC25   | 40  | 3  | -           | -           | - | - | - | - | UN       |
| 2  | 179615173 | 179615173 | G    | T | TTN     | 43  | 4  | -           | -           | - | - | - | - | nsSNV    |
| 2  | 179444880 | 179444880 | G    | T | TTN     | 91  | 6  | -           | -           | - | - | - | - | sSNV     |
| 10 | 93711     | 93711     | C    | T | TUBB8   | 31  | 4  | -           | -           | - | - | - | - | sSNV     |
| 10 | 135107202 | 135107202 | C    | A | TUBGCP2 | 42  | 5  | -           | -           | - | - | - | - | nsSNV    |
| 1  | 154242713 | 154242713 | C    | A | UBAP2L  | 69  | 5  | -           | -           | - | - | - | - | nsSNV    |
| 11 | 5529288   | 5529288   | T    | A | UBQLN3  | 30  | 4  | -           | -           | - | - | - | - | nsSNV    |
| 11 | 5529289   | 5529289   | C    | A | UBQLN3  | 31  | 4  | -           | -           | - | - | - | - | nsSNV    |
| 2  | 170897395 | 170897395 | G    | T | UBR3    | 136 | 8  | -           | -           | - | - | - | - | sSNV     |
| 17 | 73838963  | 73838963  | C    | A | UNC13D  | 80  | 5  | -           | -           | - | - | - | - | nsSNV    |
| 10 | 73051211  | 73051211  | C    | A | UNC5B   | 152 | 7  | -           | -           | - | - | - | - | sSNV     |
| 2  | 210704103 | 210704103 | C    | A | UNC80   | 124 | 6  | -           | -           | - | - | - | - | nsSNV    |
| 12 | 6971705   | 6971705   | G    | T | USP5    | 100 | 6  | -           | -           | - | - | - | - | nsSNV    |
| 8  | 67563754  | 67563754  | C    | A | VCPIP1  | 126 | 6  | -           | -           | - | - | - | - | nsSNV    |
| 2  | 219293043 | 219293043 | C    | A | VIL1    | 42  | 4  | -           | -           | - | - | - | - | nsSNV    |
| 8  | 100883761 | 100883761 | G    | T | VPS13B  | 133 | 9  | -           | -           | - | - | - | - | nsSNV    |
| 15 | 41192668  | 41192668  | G    | T | VPS18   | 80  | 5  | -           | -           | - | - | - | - | nsSNV    |
| 11 | 124620732 | 124620732 | C    | A | VSIG2   | 38  | 4  | -           | -           | - | - | - | - | nsSNV    |
| 10 | 50311832  | 50311832  | G    | T | VSTM4   | 29  | 4  | -           | -           | - | - | - | - | sSNV     |
| 12 | 6076656   | 6076656   | G    | T | VWF     | 106 | 7  | -           | -           | - | - | - | - | nsSNV    |
| 2  | 224746696 | 224746696 | C    | A | WDFY1   | 18  | 5  | -           | -           | - | - | - | - | nsSNV    |
| 19 | 990330    | 990330    | G    | T | WDR18   | 104 | 7  | -           | -           | - | - | - | - | nsSNV    |
| 2  | 128471517 | 128471517 | T    | C | WDR33   | 31  | 7  | -           | -           | - | - | - | O | nsSNV    |
| 9  | 131396134 | 131396134 | C    | A | WDR34   | 64  | 4  | -           | -           | - | - | - | - | sSNV     |
| X  | 48933211  | 48933211  | G    | T | WDR45   | 19  | 4  | -           | -           | - | - | - | - | nsSNV    |
| 19 | 33623327  | 33623327  | G    | T | WDR88   | 83  | 6  | -           | -           | - | - | - | - | nsSNV    |
| 1  | 3553560   | 3553560   | C    | A | WRAP73  | 67  | 4  | -           | -           | - | - | - | - | nsSNV    |
| 14 | 75245330  | 75245330  | C    | A | YLP1M1  | 89  | 5  | -           | -           | - | - | - | O | nsSNV    |
| 10 | 27420789  | 27420789  | C    | A | YME1L1  | 99  | 7  | -           | -           | - | - | - | - | nsSNV    |
| 3  | 114058131 | 114058131 | G    | C | ZBTB20  | 80  | 6  | -           | -           | - | - | - | - | sSNV     |
| 8  | 135621100 | 135621100 | C    | T | ZFAT    | 58  | 48 | -           | -           | - | - | - | - | sSNV     |
| 10 | 81070801  | 81070804  | CCTT | C | ZMIZ1   | 60  | 9  | -           | -           | - | - | - | - | IF del   |
| 19 | 19790848  | 19790848  | C    | A | ZNF101  | 78  | 6  | -           | -           | - | - | - | - | sSNV     |
| 19 | 44831632  | 44831632  | G    | T | ZNF112  | 78  | 5  | -           | -           | - | - | - | - | nsSNV    |
| 19 | 58944746  | 58944746  | C    | A | ZNF132  | 172 | 8  | -           | -           | - | - | - | - | nsSNV    |
| 16 | 3190790   | 3190790   | C    | A | ZNF213  | 18  | 3  | -           | -           | - | - | - | - | sSNV     |
| 19 | 44680640  | 44680640  | C    | A | ZNF226  | 153 | 7  | -           | -           | - | - | - | - | nsSNV    |
| 8  | 146201231 | 146201232 | AC   | A | ZNF252P | 117 | 13 | -           | -           | - | - | - | - | ncRNA    |
| 19 | 58452381  | 58452381  | C    | A | ZNF256  | 85  | 5  | -           | -           | - | - | - | - | nsSNV    |
| 14 | 74371680  | 74371680  | C    | T | ZNF410  | 23  | 15 | -           | -           | - | - | - | - | sSNV     |
| 5  | 121488780 | 121488780 | G    | T | ZNF474  | 294 | 10 | -           | -           | - | - | - | - | stoploss |
| 19 | 53015183  | 53015183  | G    | T | ZNF578  | 43  | 4  | -           | -           | - | - | - | - | nsSNV    |
| 4  | 87034     | 87034     | G    | T | ZNF595  | 12  | 4  | -           | -           | - | - | - | - | UN       |
| 16 | 2049619   | 2049619   | C    | T | ZNF598  | 71  | 5  | rs369892816 | rs369892816 | - | - | - | - | nsSNV    |
| 3  | 40558080  | 40558080  | G    | T | ZNF620  | 81  | 6  | -           | -           | - | - | - | - | nsSNV    |
| 16 | 31090723  | 31090723  | G    | T | ZNF646  | 90  | 5  | -           | -           | - | - | - | - | nsSNV    |
| 19 | 53668299  | 53668299  | C    | T | ZNF665  | 108 | 23 | -           | -           | - | - | - | - | nsSNV    |
| 8  | 146067311 | 146067311 | G    | T | ZNF7    | 113 | 6  | -           | -           | - | - | - | - | sSNV     |
| 19 | 57755340  | 57755340  | G    | T | ZNF805  | 125 | 6  | -           | -           | - | - | - | - | nsSNV    |
| 19 | 53056925  | 53056925  | C    | A | ZNF808  | 57  | 5  | -           | -           | - | - | - | - | sSNV     |
| 16 | 71894454  | 71894454  | G    | A | ZNF821  | 108 | 8  | -           | -           | - | - | - | - | nsSNV    |
| 16 | 71894455  | 71894455  | C    | G | ZNF821  | 107 | 8  | -           | -           | - | - | - | - | sSNV     |
| 14 | 102792656 | 102792656 | C    | A | ZNF839  | 61  | 5  | -           | -           | - | - | - | - | nsSNV    |
| 19 | 53855540  | 53855540  | C    | A | ZNF845  | 87  | 6  | -           | -           | - | - | - | - | nsSNV    |
| 19 | 52888464  | 52888464  | G    | T | ZNF880  | 71  | 5  | -           | -           | - | - | - | - | nsSNV    |
| 1  | 238053762 | 238053762 | C    | A | ZP4     | 117 | 6  | -           | -           | - | - | - | - | nsSNV    |
| 1  | 45553675  | 45553675  | C    | A | ZSWIM5  | 116 | 6  | -           | -           | - | - | - | - | nsSNV    |

\*NonFlagged: dbSNP files subtracting Flagged dbSNP entries. Flagged SNPs include SNPs < 1% minor allele frequency (MAF) (or unknown), mapping only once to reference assembly, flagged in dbSnp as "clinically associated".

\*\*nsSNV: non-synonymous SNV, sSNV: synonymous SNV, FS ins: frameshift insertion, FS del: frameshift deletion, IF ins: in-frame insertion, IF del: in-frame deletion, ncRNA: non-coding RNA, UN: Unknown. transcript maps to multiple locations, all as "coding transcripts", but none has a complete ORF.



**Table S3. Processed WES data**

**(F) AYA10**

| Chr | Start     | End       | Ref      | Alt      | Altered gene | T_Ref | T_Alt | dbSNP138    |             | CVE list |   |   | Mutation context** |
|-----|-----------|-----------|----------|----------|--------------|-------|-------|-------------|-------------|----------|---|---|--------------------|
|     |           |           |          |          |              |       |       | All         | NonFlagged* | C        | V | E |                    |
| 20  | 47601265  | 47601265  | G        | C        | ARFGEF2      | 44    | 5     | -           | -           | -        | - | - | splicing           |
| 12  | 58005746  | 58005746  | C        | T        | ARHGEF25     | 44    | 31    | -           | -           | -        | - | - | sSNV               |
| 9   | 135762805 | 135762805 | T        | G        | C9orf9       | 14    | 6     | -           | -           | -        | - | - | nsSNV              |
| 19  | 45912489  | 45912492  | CAAG     | C        | CD3EAP       | 98    | 6     | -           | -           | -        | - | - | IF del             |
| 17  | 45234301  | 45234301  | C        | A        | CDC27        | 21    | 3     | -           | -           | -        | - | O | nsSNV              |
| 17  | 45234707  | 45234707  | T        | A        | CDC27        | 25    | 4     | rs75353677  | rs75353677  | -        | - | O | nsSNV              |
| 1   | 22902839  | 22902839  | G        | A        | EPHA8        | 64    | 4     | -           | -           | -        | - | - | nsSNV              |
| 14  | 76905825  | 76905825  | C        | CG       | ESRRB        | 46    | 7     | -           | -           | -        | - | - | FS ins             |
| 4   | 126369825 | 126369825 | A        | G        | FAT4         | 137   | 5     | -           | -           | -        | - | - | nsSNV              |
| 15  | 51675998  | 51675998  | C        | T        | GLDN         | 15    | 3     | -           | -           | -        | - | - | sSNV               |
| 4   | 3076665   | 3076665   | A        | AGCCGCCA | HTT          | 19    | 7     | -           | -           | -        | - | - | IF ins             |
| 17  | 39412119  | 39412119  | C        | A        | KRTAP9-9     | 49    | 5     | rs77134625  | rs77134625  | -        | - | - | nsSNV              |
| 17  | 39412093  | 39412093  | C        | A        | KRTAP9-9     | 42    | 5     | -           | -           | -        | - | - | sSNV               |
| 11  | 95825371  | 95825374  | CTGT     | C        | MAML2        | 43    | 13    | -           | -           | O        | - | - | IF del             |
| 11  | 95825362  | 95825362  | C        | T        | MAML2        | 37    | 3     | -           | -           | O        | - | - | sSNV               |
| 12  | 5603608   | 5603608   | G        | GC       | NTF3         | 77    | 8     | -           | -           | -        | - | - | FS ins             |
| 12  | 80665560  | 80665560  | C        | A        | OTOGL        | 89    | 26    | -           | -           | -        | - | - | nsSNV              |
| 16  | 70154480  | 70154480  | A        | G        | PDPR         | 26    | 3     | rs200469748 | rs200469748 | -        | - | - | nsSNV              |
| 20  | 9389295   | 9389295   | A        | T        | PLCB4        | 121   | 8     | -           | -           | -        | - | - | nsSNV              |
| 1   | 3322119   | 3322119   | G        | GC       | PRDM16       | 95    | 13    | -           | -           | O        | - | - | FS ins             |
| 12  | 15677895  | 15677895  | A        | C        | PTPRO        | 78    | 6     | -           | -           | -        | - | - | nsSNV              |
| 22  | 42910199  | 42910199  | G        | A        | RRP7A        | 51    | 6     | rs3752505   | rs146958654 | -        | - | - | nsSNV              |
| 5   | 77717632  | 77717632  | A        | T        | SCAMP1       | 192   | 11    | -           | -           | -        | - | - | unknown            |
| 14  | 92920290  | 92920290  | C        | T        | SLC24A4      | 64    | 6     | -           | -           | -        | - | - | sSNV               |
| 16  | 2816115   | 2816115   | A        | AC       | SRRM2        | 455   | 26    | -           | -           | -        | - | - | FS ins             |
| 1   | 152083369 | 152083369 | T        | TC       | TCHH         | 227   | 13    | -           | -           | -        | - | - | FS ins             |
| 16  | 67876787  | 67876796  | GCAGCAGC | G        | THAP11       | 28    | 25    | -           | -           | -        | - | - | IF del             |
| 4   | 166964538 | 166964538 | C        | A        | TLL1         | 67    | 5     | -           | -           | -        | - | O | nsSNV              |
| 7   | 43917136  | 43917136  | A        | AC       | URGCP        | 157   | 10    | -           | -           | -        | - | - | FS ins             |

\*NonFlagged: dbSNP files subtracting Flagged dbSNP entries. Flagged SNPs include SNPs < 1% minor allele frequency (MAF) (or unknown), mapping only once to reference assembly, flagged in dbSnp as "clinically associated".

\*\*nsSNV: non-synonymous SNV, sSNV: synonymous SNV, FS ins: frameshift insertion, FS del: frameshift deletion, IF ins: in-frame insertion, IF del: in-frame deletion, ncRNA: non-coding RNA, UN: Unknown. transcript maps to multiple locations, all as "coding transcripts", but none has a complete ORF.
