# Supplementary material for: Clinical application of genomic profiling to find druggable targets for adolescent and young adult (AYA) cancer patients with metastasis
Source: Springer Nature journal article supplement (doi:10.1186/s12885-016-2209-1), 2016-02-29
Supplement: MOESM5 [file 9746198]

**Table S4. Patient-specific genetic alterations of TCGA AML study selected by our pattern-based annotation**

ITALIC: BOTH TSG/OG

| Sample# | NEJM & Ours                                                                                             | NEJM only | Ours only                            |
|---------|---------------------------------------------------------------------------------------------------------|-----------|--------------------------------------|
| 2802    | DNMT3A (1), IDH1 (1), <i>NPM1 (1)</i> , PTPN11 (3)                                                      | --        | --                                   |
| 2803    | --                                                                                                      | --        | --                                   |
| 2804    | <i>PHF6 (1)</i>                                                                                         | --        | --                                   |
| 2805    | IDH2 (1), <i>RUNX1 (1)</i>                                                                              | --        | --                                   |
| 2806    | --                                                                                                      | --        | <i>KDM6A (1)</i>                     |
| 2807    | IDH2 (1), <i>RUNX1 (3)</i>                                                                              | --        | <i>ASXL1 (1)</i> , USP6 (3)          |
| 2808    | <i>CEBPA (3)</i> , <i>NRAS (1)</i>                                                                      | --        | <i>CSF3R (3)</i>                     |
| 2809    | DNMT3A (1), <i>NPM1 (1)</i>                                                                             | --        | --                                   |
| 2810    | IDH2 (1), <i>NPM1 (1)</i>                                                                               | --        | --                                   |
| 2811    | DNMT3A (1), FLT3 (3), <i>NPM1 (1)</i> , SMC1A (2)                                                       | --        | <i>PTCH1 (1)</i>                     |
| 2812    | FLT3 (3), <i>NPM1 (1)</i>                                                                               | --        | --                                   |
| 2813    | <i>TP53 (1)</i>                                                                                         | --        | --                                   |
| 2814    | FLT3 (3)                                                                                                | --        | --                                   |
| 2816    | DNMT3A (1), FLT3 (3), <i>NPM1 (1)</i> , <i>NRAS (1)</i>                                                 | --        | --                                   |
| 2817    | EZH2 (3), FAM5C (2)                                                                                     | --        | <i>CBFB (1)</i>                      |
| 2818    | DNMT3A (3), FLT3 (3), <i>NPM1 (1)</i> , <i>RAD21 (1)</i>                                                | --        | --                                   |
| 2819    | KIT (3)                                                                                                 | --        | --                                   |
| 2820    | <i>TP53 (1)</i>                                                                                         | --        | <i>SUZ12 (1)</i>                     |
| 2821    | IDH1 (1), IDH2 (1), <i>RUNX1 (1)</i> , U2AF1 (3)                                                        | --        | <i>ASXL1 (1)</i>                     |
| 2822    | DNMT3A (1), IDH1 (1), SMC1A (3), <i>TET2 (1)</i>                                                        | --        | MED12 (3)                            |
| 2823    | --                                                                                                      | --        | --                                   |
| 2824    | DNMT3A (3), <i>NPM1 (1)</i> , SMC1A (2)                                                                 | --        | --                                   |
| 2825    | DNMT3A (1), FLT3 (1), <i>NPM1 (1)</i>                                                                   | --        | --                                   |
| 2826    | IDH2 (1), KRAS (1), <i>NPM1 (1)</i>                                                                     | --        | --                                   |
| 2827    | --                                                                                                      | --        | MYC (1)                              |
| 2828    | --                                                                                                      | --        | --                                   |
| 2829    | <i>TP53 (1)</i>                                                                                         | --        | --                                   |
| 2830    | DNMT3A (1), FLT3 (3), <i>TET2 (1)</i>                                                                   | --        | --                                   |
| 2831    | DNMT3A (3)                                                                                              | --        | --                                   |
| 2832    | --                                                                                                      | --        | --                                   |
| 2833    | DNMT3A (1)                                                                                              | --        | <i>CBFB (1)</i>                      |
| 2834    | FLT3 (3)                                                                                                | --        | --                                   |
| 2835    | <i>NPM1 (1)</i>                                                                                         | --        | --                                   |
| 2836    | FLT3 (3), <i>NPM1 (1)</i>                                                                               | --        | --                                   |
| 2837    | <i>NPM1 (1)</i>                                                                                         | --        | --                                   |
| 2838    | FAM5C (2/3), <i>NRAS (1)</i>                                                                            | --        | --                                   |
| 2839    | <i>CEBPA (1)</i> , DNMT3A (3), <i>NPM1 (1)</i> , <i>NRAS (1)</i> , PTPN11 (3), SMC3 (3), <i>WT1 (1)</i> | --        | --                                   |
| 2840    | FLT3 (3)                                                                                                | --        | --                                   |
| 2841    | --                                                                                                      | --        | --                                   |
| 2842    | --                                                                                                      | --        | --                                   |
| 2843    | KIT (1/3), U2AF1 (1)                                                                                    | --        | --                                   |
| 2844    | SMC1A (3), <i>WT1 (1)</i>                                                                               | --        | --                                   |
| 2845    | <i>CEBPA (1/3)</i> , <i>TET2 (1)</i>                                                                    | --        | CAPRIN2 (3)                          |
| 2846    | KIT (3), <i>WT1 (1)</i>                                                                                 | --        | --                                   |
| 2847    | U2AF1 (1)                                                                                               | --        | --                                   |
| 2848    | <i>NPM1 (1)</i>                                                                                         | --        | --                                   |
| 2849    | --                                                                                                      | --        | <i>KDM3B (2)</i> , <i>THRAP3 (3)</i> |
| 2850    | IDH2 (1), <i>RUNX1 (1)</i> , <i>STAG2 (1)</i>                                                           | --        | <i>NOTCH1 (1)</i> , SRSF2 (3)        |
| 2851    | DNMT3A (1), FLT3 (3), SMC3 (1)                                                                          | --        | --                                   |
| 2853    | DNMT3A (1), FLT3 (3), <i>NPM1 (1)</i> , SMC3 (2)                                                        | --        | --                                   |
| 2854    | --                                                                                                      | --        | --                                   |
| 2855    | <i>PHF6 (1)</i> , PTPN11 (1)                                                                            | --        | --                                   |
| 2857    | <i>TP53 (1)</i>                                                                                         | --        | --                                   |
| 2858    | SMC1A (3)                                                                                               | --        | --                                   |
| 2859    | DNMT3A (1), <i>HNRNP1K (1)</i> , <i>NPM1 (1)</i>                                                        | --        | --                                   |
| 2860    | <i>TP53 (1)</i>                                                                                         | --        | --                                   |
| 2861    | DNMT3A (1), KRAS (1), <i>NPM1 (1)</i> , U2AF1 (1)                                                       | --        | HDAC2 (2), TUSC3 (2)                 |
| 2862    | --                                                                                                      | --        | --                                   |
| 2863    | <i>CEBPA (3)</i> , DNMT3A (1), IDH1 (1)                                                                 | --        | EGFR (3)                             |
| 2864    | DNMT3A (1), IDH2 (1), KRAS (1)                                                                          | --        | <i>ASXL1 (1)</i>                     |
| 2865    | EZH2 (3), KRAS (1), <i>RUNX1 (1/3)</i> , <i>TET2 (1)</i>                                                | --        | JAK2 (1)                             |
| 2866    | IDH2 (1)                                                                                                | --        | --                                   |
| 2867    | DNMT3A (3), IDH1 (1)                                                                                    | --        | <i>KDM6A (3)</i>                     |
| 2868    | <i>TP53 (1)</i>                                                                                         | --        | --                                   |
| 2869    | DNMT3A (1), FLT3 (1), <i>NPM1 (1)</i>                                                                   | --        | PAX3 (2)                             |
| 2870    | FLT3 (3), <i>NRAS (1)</i>                                                                               | --        | --                                   |
| 2871    | FLT3 (3), <i>NPM1 (1)</i> , PTPN11 (1), <i>STAG2 (1)</i>                                                | --        | ELF4 (2), <i>THRAP3 (1)</i>          |
| 2872    | --                                                                                                      | --        | TCL1A (3)                            |
| 2873    | DNMT3A (1), <i>TET2 (1)</i>                                                                             | --        | --                                   |
| 2874    | <i>CEBPA (3)</i> , IDH2 (1), <i>WT1 (1)</i>                                                             | --        | <i>SMG1 (3)</i>                      |
| 2875    | FLT3 (3)                                                                                                | --        | --                                   |
| 2876    | <i>TET2 (1)</i>                                                                                         | --        | --                                   |
| 2877    | FLT3 (3), IDH2 (1), <i>NPM1 (1)</i>                                                                     | --        | --                                   |
| 2878    | <i>TP53 (1)</i>                                                                                         | --        | EGFR (1)                             |
| 2879    | FLT3 (1), <i>NPM1 (1)</i> , <i>TET2 (1)</i>                                                             | --        | --                                   |
| 2880    | <i>CEBPA (1)</i> , FLT3 (1)                                                                             | --        | --                                   |
| 2881    | KIT (3)                                                                                                 | --        | --                                   |
| 2882    | U2AF1 (1)                                                                                               | --        | <i>SMG1 (3)</i>                      |
| 2883    | --                                                                                                      | --        | <i>KDM6A (1)</i>                     |
| 2884    | DNMT3A (1), IDH1 (1), <i>NPM1 (1)</i> , PTPN11 (1)                                                      | --        | --                                   |
| 2885    | PTPN11 (1), <i>TP53 (1)</i>                                                                             | --        | --                                   |

|      |                                                              |    |                       |
|------|--------------------------------------------------------------|----|-----------------------|
| 2886 | <u>RAD21 (1)</u>                                             | -- | JAK3 (1)              |
| 2887 | DNMT3A (3), EZH2 (3), IDH1 (1), NRAS (1)                     | -- | --                    |
| 2888 | KIT (3)                                                      | -- | --                    |
| 2889 | --                                                           | -- | --                    |
| 2890 | <u>RUNX1 (1)</u>                                             | -- | --                    |
| 2891 | DNMT3A (1/3), IDH2 (1)                                       | -- | --                    |
| 2892 | NRAS (1)                                                     | -- | --                    |
| 2893 | --                                                           | -- | --                    |
| 2894 | --                                                           | -- | --                    |
| 2895 | DNMT3A (1), FLT3 (1), <u>NPM1 (1)</u>                        | -- | PRDM16 (3)            |
| 2896 | DNMT3A (1), <u>NPM1 (1)</u>                                  | -- | --                    |
| 2897 | --                                                           | -- | MLLT4 (3)             |
| 2898 | DNMT3A (1/3), IDH2 (1)                                       | -- | --                    |
| 2899 | <u>RUNX1 (3)</u>                                             | -- | SETBP1 (1)            |
| 2900 | <u>CEBPA (1)</u> , FLT3 (3), <u>NPM1 (1)</u> , SMC1A (2)     | -- | NOTCH2 (3)            |
| 2901 | IDH1 (1)                                                     | -- | --                    |
| 2903 | <u>NPM1 (1)</u>                                              | -- | --                    |
| 2904 | <u>TP53 (1)</u>                                              | -- | --                    |
| 2905 | <u>WT1 (1)</u>                                               | -- | CSMD1 (1)             |
| 2906 | FLT3 (3)                                                     | -- | IKZF1 (3)             |
| 2907 | IDH2 (1), <u>RUNX1 (1)</u>                                   | -- | ASXL1 (1)             |
| 2908 | DNMT3A (1), SMC3 (3), TET2 (1), TP53 (1)                     | -- | ARID1A (3), KDM3B (1) |
| 2909 | FLT3 (3)                                                     | -- | --                    |
| 2910 | FLT3 (3)                                                     | -- | CIC (3)               |
| 2911 | --                                                           | -- | --                    |
| 2912 | DNMT3A (1), PHF6 (1), <u>RUNX1 (3)</u> , SMC3 (3), U2AF1 (1) | -- | --                    |
| 2913 | FLT3 (3), <u>NPM1 (1)</u> , STAG2 (1), WT1 (1)               | -- | --                    |
| 2914 | PTPN11 (1)                                                   | -- | CBL (1)               |
| 2915 | FLT3 (3), <u>NPM1 (3)</u>                                    | -- | --                    |
| 2916 | DNMT3A (1)                                                   | -- | CSMD1 (3), MYB (3)    |
| 2917 | KRAS (1)                                                     | -- | MED12 (1), SETBP1 (3) |
| 2918 | FLT3 (3)                                                     | -- | --                    |
| 2919 | DNMT3A (3), IDH1 (1), <u>NPM1 (1)</u> , WT1 (3)              | -- | --                    |
| 2920 | --                                                           | -- | NF1 (1)               |
| 2921 | FLT3 (3)                                                     | -- | --                    |
| 2922 | FLT3 (3)                                                     | -- | --                    |
| 2923 | NRAS (1), TET2 (1)                                           | -- | --                    |
| 2924 | FLT3 (3), <u>NPM1 (1)</u>                                    | -- | --                    |
| 2925 | DNMT3A (1), FLT3 (3), <u>NPM1 (1)</u>                        | -- | CSMD1 (3), GATA2 (3)  |
| 2926 | FLT3 (3), IDH1 (1)                                           | -- | --                    |
| 2927 | <u>RUNX1 (1/3)</u>                                           | -- | ASXL1 (1)             |
| 2928 | DNMT3A (3), FLT3 (1), IDH1 (1), TET2 (1/3)                   | -- | --                    |
| 2929 | KRAS (1)                                                     | -- | SF3B1 (1)             |
| 2930 | FLT3 (3), <u>WT1 (1)</u>                                     | -- | --                    |
| 2931 | DNMT3A (1), FLT3 (3), <u>NPM1 (1)</u>                        | -- | --                    |
| 2932 | <u>NPM1 (1)</u> , NRAS (1)                                   | -- | SETD2 (1)             |
| 2933 | <u>RUNX1 (3)</u>                                             | -- | --                    |
| 2934 | DNMT3A (3), FLT3 (3), IDH2 (1)                               | -- | --                    |
| 2935 | <u>TP53 (1)</u>                                              | -- | --                    |
| 2936 | IDH2 (1), <u>RUNX1 (1)</u>                                   | -- | --                    |
| 2937 | HNRNP1 (1), KIT (3), TET2 (1)                                | -- | --                    |
| 2938 | DNMT3A (3), <u>TP53 (1)</u>                                  | -- | --                    |
| 2939 | KIT (3)                                                      | -- | --                    |
| 2940 | <u>CEBPA (1/3)</u>                                           | -- | --                    |
| 2941 | <u>TP53 (1)</u>                                              | -- | --                    |
| 2942 | FLT3 (3)                                                     | -- | --                    |
| 2943 | <u>TP53 (1)</u>                                              | -- | --                    |
| 2945 | DNMT3A (1), FLT3 (3), IDH1 (1), KIT (3), <u>NPM1 (1)</u>     | -- | --                    |
| 2946 | --                                                           | -- | --                    |
| 2947 | DNMT3A (1), FLT3 (3), <u>NPM1 (1)</u>                        | -- | --                    |
| 2948 | IDH2 (1)                                                     | -- | --                    |
| 2949 | DNMT3A (1), IDH1 (1), <u>RUNX1 (1)</u>                       | -- | SUZ12 (1)             |
| 2950 | SMC3 (1)                                                     | -- | ARHGAP35 (3)          |
| 2952 | <u>CEBPA (1)</u> , NRAS (1), TP53 (1)                        | -- | FAT1 (3), MDM2 (3)    |
| 2954 | --                                                           | -- | --                    |
| 2955 | <u>CEBPA (1/3)</u> , DNMT3A (1)                              | -- | GATA2 (3)             |
| 2956 | --                                                           | -- | --                    |
| 2957 | FLT3 (3)                                                     | -- | --                    |
| 2959 | IDH2 (1), PHF6 (1), <u>RUNX1 (1)</u>                         | -- | --                    |
| 2963 | FLT3 (3), <u>NPM1 (1)</u> , PTPN11 (1), SMC1A (3)            | -- | --                    |
| 2964 | STAG2 (1), TET2 (1/3)                                        | -- | CAMTA1 (3)            |
| 2965 | DNMT3A (1), FAM5C (3), FLT3 (3), <u>NPM1 (1)</u> , TET2 (1)  | -- | --                    |
| 2966 | DNMT3A (3), IDH2 (1), KRAS (1)                               | -- | SMG1 (2)              |
| 2967 | DNMT3A (3), <u>NPM1 (1)</u> , NRAS (1), RAD21 (1)            | -- | --                    |
| 2968 | DNMT3A (1/3), NRAS (1), U2AF1 (1)                            | -- | BCOR (1)              |
| 2969 | DNMT3A (1), FLT3 (3), IDH1 (1), <u>NPM1 (1)</u>              | -- | --                    |
| 2970 | FLT3 (3), <u>RUNX1 (1)</u> , WT1 (1)                         | -- | BCOR (1)              |
| 2971 | TET2 (1/3)                                                   | -- | --                    |
| 2972 | <u>NPM1 (1)</u> , PTPN11 (1), STAG2 (1)                      | -- | --                    |
| 2973 | IDH2 (1), <u>NPM1 (1)</u>                                    | -- | --                    |
| 2974 | DNMT3A (1), FLT3 (3), <u>NPM1 (1)</u>                        | -- | --                    |
| 2975 | DNMT3A (1), <u>RAD21 (1)</u>                                 | -- | --                    |
| 2976 | FAM5C (3), FLT3 (3), <u>NPM1 (1)</u> , PHF6 (3), WT1 (1)     | -- | --                    |

|      |                                          |    |                                        |
|------|------------------------------------------|----|----------------------------------------|
| 2977 | IDH1 (1)                                 | -- | --                                     |
| 2978 | NRAS (1), RUNX1 (1), STAG2 (1), TET2 (1) | -- | --                                     |
| 2979 | CEBPA (1/3)                              | -- | --                                     |
| 2980 | FLT3 (3)                                 | -- | --                                     |
| 2981 | DNMT3A (1), FLT3 (3), NPM1 (1)           | -- | --                                     |
| 2982 | --                                       | -- | --                                     |
| 2983 | RUNX1 (3)                                | -- | --                                     |
| 2984 | IDH1 (1), NPM1 (1), NRAS (1)             | -- | --                                     |
| 2985 | NRAS (1)                                 | -- | --                                     |
| 2986 | FLT3 (1), NPM1 (1), RAD21 (1)            | -- | --                                     |
| 2987 | DNMT3A (1), KRAS (1), NPM1 (1)           | -- | PDGFRA (3)                             |
| 2988 | DNMT3A (3), NPM1 (1)                     | -- | --                                     |
| 2989 | NPM1 (1), WT1 (1)                        | -- | CBL (3)                                |
| 2990 | IDH1 (1), NPM1 (1)                       | -- | --                                     |
| 2991 | --                                       | -- | ARID2 (1), MAX (1)                     |
| 2992 | IDH1 (1), NPM1 (1)                       | -- | --                                     |
| 2993 | DNMT3A (3), FLT3 (3), NPM1 (1), SMC3 (3) | -- | --                                     |
| 2994 | FLT3 (3)                                 | -- | --                                     |
| 2995 | --                                       | -- | --                                     |
| 2996 | TET2 (1/3), U2AF1 (1)                    | -- | MPL (3)                                |
| 2997 | --                                       | -- | --                                     |
| 2998 | FAM5C (2), FLT3 (3)                      | -- | --                                     |
| 2999 | --                                       | -- | ABL1 (3)                               |
| 3000 | CEBPA (1/3)                              | -- | --                                     |
| 3001 | --                                       | -- | --                                     |
| 3002 | IDH2 (1)                                 | -- | --                                     |
| 3005 | --                                       | -- | --                                     |
| 3006 | FLT3 (1), TET2 (1)                       | -- | --                                     |
| 3007 | FLT3 (3)                                 | -- | --                                     |
| 3008 | CEBPA (3)                                | -- | --                                     |
| 3009 | PHF6 (3), RUNX1 (1), WT1 (1)             | -- | CTCF (1), DAXX (3), NF1 (1), SUZ12 (3) |
| 3011 | IDH1 (1), NPM1 (1)                       | -- | --                                     |
| 3012 | --                                       | -- | --                                     |
