# Supplementary material for: Clinical application of genomic profiling to find druggable targets for adolescent and young adult (AYA) cancer patients with metastasis
Source: Springer Nature journal article supplement (doi:10.1186/s12885-016-2209-1), 2016-02-29
Supplement: MOESM6 [file 9746198]

**Table S5. Candidate driving genetic alterations of AYA cancers**

| No. AYA | Cancer Type                           | Oncogenic type  | Altered gene | Mutation type | Allele Freq. | Protein change          | R <sup>†</sup> | Class | Level          |
|---------|---------------------------------------|-----------------|--------------|---------------|--------------|-------------------------|----------------|-------|----------------|
| #01     | Prostate cancer                       | M               | ATAD5        | nsSNV         | 0.12         | G451D                   | 0              | C2    | Lv3 TSG        |
|         |                                       |                 | NF1          | FS del        | 0.17         | S1561fs <sup>‡</sup>    | 0              | C1    | Lv1 TSG        |
|         |                                       |                 | NF1          | LOH           | -            | -                       | -              | CNV   | Lv1 TSG        |
|         |                                       |                 | RASA2        | splicing      | 0.09         | A742_splice             | 0              | C2    | Lv1 TSG        |
|         |                                       |                 | RASA2        | FS ins        | 0.09         | D282fs                  | 0              | C2    | Lv1 TSG        |
|         |                                       |                 | SUZ12        | LOH           | -            | -                       | -              | CNV   | Lv2 TSG        |
| #02     | Olfactory neuroblastoma               | C               | BRINP1       | IF ins        | 0.58         | 681_682insT             | 0              | C2    | Lv3 TSG        |
|         |                                       |                 | CARD11       | FS ins        | 0.44         | Y609fs                  | 0              | C1    | Lv3 OG         |
|         |                                       |                 | CDKN2C       | nonsense      | 0.67         | Q26* <sup>‡</sup>       | 0              | C1    | Lv1 TSG        |
|         |                                       |                 | MEIS1        | FS ins        | 0.08         | R102fs                  | 0              | C2    | Lv3 OG         |
|         |                                       |                 | MINK1        | nsSNV         | 0.64         | E837K <sup>‡</sup>      | 0              | C2    | Lv3 TSG        |
|         |                                       |                 | PPP6C        | splicing      | 0.15         | G80_splice <sup>‡</sup> | 0              | C2    | Lv1 TSG        |
|         |                                       |                 | TGFBR2       | nsSNV         | 0.08         | R49S                    | 0              | C2    | Lv3 TSG/Lv3 OG |
|         |                                       |                 | TP53         | nsSNV         | 0.57         | M237V <sup>‡</sup>      | >30            | C1    | Lv1 TSG        |
| #04     | Head and neck squamous cell carcinoma | C               | ANK2         | nsSNV         | 0.16         | H2013Y                  | 0              | C2    | Lv3 TSG        |
|         |                                       |                 | AXIN1        | LOH           | -            | -                       | -              | CNV   | Lv2 TSG        |
|         |                                       |                 | BAP1         | LOH           | -            | -                       | -              | CNV   | Lv2 TSG        |
|         |                                       |                 | CDH1         | LOH           | -            | -                       | -              | CNV   | Lv2 TSG        |
|         |                                       |                 | CHD5         | nsSNV         | 0.17         | R1891W                  | 0              | C2    | Lv3 TSG        |
|         |                                       |                 | FAT1         | FS ins        | 0.20         | L3696fs                 | -              | C2    | Lv1 TSG/Lv3 OG |
|         |                                       |                 | FOXL2        | nsSNV         | 0.30         | P157A                   | 0              | C1    | Lv3 OG         |
|         |                                       |                 | ITGB4        | nsSNV         | 0.10         | E839V <sup>‡</sup>      | 0              | C2    | Lv3 OG         |
|         |                                       |                 | LECT1        | nsSNV         | 0.10         | W325G <sup>‡</sup>      | 0              | C2    | Lv3 TSG        |
|         |                                       |                 | MSX1         | nsSNV         | 0.09         | S208L                   | 1              | C2    | Lv2 TSG        |
|         |                                       |                 | NOTCH1       | Focal del     | -            | -                       | -              | CNV   | Lv1 TSG        |
|         |                                       |                 | NOTCH1       | LOH           | -            | -                       | -              | CNV   | Lv1 TSG        |
|         |                                       |                 | PTCH1        | LOH           | -            | -                       | -              | CNV   | Lv2 TSG        |
|         |                                       |                 | SETD2        | Focal del     | -            | -                       | -              | CNV   | Lv2 TSG        |
|         |                                       |                 | SETD2        | LOH           | -            | -                       | -              | CNV   | Lv2 TSG        |
|         |                                       |                 | SMAD4        | Focal del     | -            | -                       | -              | CNV   | Lv1 TSG        |
|         |                                       |                 | TP53         | splicing      | 0.28         | S33_splice <sup>‡</sup> | >5             | C1    | Lv1 TSG        |
|         |                                       |                 | USP6         | nsSNV         | 0.05         | R133K                   | 2              | C2    | Lv2 OG         |
| #06     | Urachal carcinoma                     | M               | CDH1         | LOH           | -            | -                       | -              | CNV   | Lv2 TSG        |
|         |                                       |                 | KRAS         | nsSNV         | 0.07         | G13D <sup>‡</sup>       | >100           | C1    | Lv1 OG         |
|         |                                       |                 | USP6         | nsSNV         | 0.08         | R133K                   | 2              | C2    | Lv2 OG         |
| #09     | Lung cancer                           | NA <sup>§</sup> | EML4-ALK     | Fusion        | -            | -                       | -              | OG    |                |
| #10     | Liposarcoma                           | C               | MDM2         | Focal amp     | -            | -                       | -              | CNV   | Lv1 OG         |
|         |                                       |                 | PRDM16       | FS ins        | 0.12         | A365fs <sup>‡</sup>     | 1              | C2    | Lv2 OG         |
|         |                                       |                 | PTEN         | Focal del     | -            | -                       | -              | CNV   | Lv1 TSG        |
|         |                                       |                 | PTPRO        | nsSNV         | 0.07         | K680T <sup>‡</sup>      | 1              | C2    | Lv2 TSG        |
|         |                                       |                 | URGCP        | FS ins        | 0.06         | F643fs <sup>‡</sup>     | 1              | C2    | Lv2 OG         |

\*stop codon

†recurrence by cBio portal

‡ more than one NM number

§ not applicable
