# Supplementary material for: Clinical application of genomic profiling to find druggable targets for adolescent and young adult (AYA) cancer patients with metastasis
Source: Springer Nature journal article supplement (doi:10.1186/s12885-016-2209-1), 2016-02-29
Supplement: MOESM7 [file 9746198]

## **Table S6. RasGAPs in large-scale studies**

Analysis date: 2015-03-11
