# Supplementary material for: Clinical application of genomic profiling to find druggable targets for adolescent and young adult (AYA) cancer patients with metastasis
Source: Springer Nature journal article supplement (doi:10.1186/s12885-016-2209-1), 2016-02-29
Supplement: MOESM8 [file 9746198]

**Table S7. EML4-ALK fusion in AYA09**

| Gene 1 |          |          |      |        | Gene 2 |          |          |      |        | Score* |
|--------|----------|----------|------|--------|--------|----------|----------|------|--------|--------|
| Chr    | Start    | End      | Gene | Strand | Chr    | Start    | End      | Gene | Strand |        |
| 2      | 42396489 | 42491870 | EML4 | +      | 2      | 29415639 | 29446393 | ALK  | -      | 4      |

\*from chimerascan: Total fragments supporting chimera
