# Supplementary material for: Clinical application of genomic profiling to find druggable targets for adolescent and young adult (AYA) cancer patients with metastasis
Source: Springer Nature journal article supplement (doi:10.1186/s12885-016-2209-1), 2016-02-29
Supplement: MOESM10 [file 9746198]

**Table S8. CVE list**

| #  | Gene Symbol | Cancer gene census | Vogelstein list | Elledge list |
|----|-------------|--------------------|-----------------|--------------|
| 1  | ABCA10      | -                  | -               | 0            |
| 2  | ABCB1       | -                  | -               | 0            |
| 3  | ABI1        | 0                  | -               | 0            |
| 4  | ABL1        | 0                  | 0               | -            |
| 5  | ABL2        | 0                  | -               | -            |
| 6  | ACADS       | -                  | -               | 0            |
| 7  | ACBD3       | -                  | -               | 0            |
| 8  | ACSL3       | 0                  | -               | -            |
| 9  | ACVR1B      | -                  | 0               | 0            |
| 10 | ACVR2A      | -                  | -               | 0            |
| 11 | ADAMTS19    | -                  | -               | 0            |
| 12 | ADRBK2      | -                  | -               | 0            |
| 13 | AF15Q14     | 0                  | -               | -            |
| 14 | AF1Q        | 0                  | -               | -            |
| 15 | AF3p21      | 0                  | -               | -            |
| 16 | AF5q31      | 0                  | -               | -            |
| 17 | AFF4        | -                  | -               | 0            |
| 18 | AJUBA       | -                  | -               | 0            |
| 19 | AK8         | -                  | -               | 0            |
| 20 | AKAP9       | 0                  | -               | -            |
| 21 | AKT1        | 0                  | 0               | 0            |
| 22 | AKT2        | 0                  | -               | -            |
| 23 | ALDH1L2     | -                  | -               | 0            |
| 24 | ALDH2       | 0                  | -               | -            |
| 25 | ALK         | 0                  | 0               | 0            |
| 26 | ALO17       | 0                  | -               | -            |
| 27 | AMBRA1      | -                  | -               | 0            |
| 28 | AMER1       | -                  | -               | 0            |
| 29 | AMOT        | -                  | -               | 0            |
| 30 | ANKRD46     | -                  | -               | 0            |
| 31 | ANO3        | -                  | -               | 0            |
| 32 | AOAH        | -                  | -               | 0            |
| 33 | APC         | 0                  | 0               | 0            |
| 34 | APPBP2      | -                  | -               | 0            |
| 35 | AQP2        | -                  | -               | 0            |
| 36 | AR          | -                  | 0               | -            |
| 37 | ARF4        | -                  | -               | 0            |
| 38 | ARHGAP35    | -                  | -               | 0            |
| 39 | ARHGAP5     | -                  | -               | 0            |
| 40 | ARHGEF12    | 0                  | -               | -            |
| 41 | ARHGEF33    | -                  | -               | 0            |
| 42 | ARHH        | 0                  | -               | -            |
| 43 | ARID1A      | 0                  | 0               | 0            |
| 44 | ARID1B      | -                  | 0               | 0            |
| 45 | ARID2       | 0                  | 0               | 0            |
| 46 | ARNT        | 0                  | -               | -            |

|    |         |   |   |   |
|----|---------|---|---|---|
| 47 | ASCC3   | - | - | 0 |
| 48 | ASPSCR1 | 0 | - | - |
| 49 | ASXL1   | 0 | 0 | 0 |
| 50 | ASXL2   | - | - | 0 |
| 51 | ATAD2   | - | - | 0 |
| 52 | ATF1    | 0 | - | - |
| 53 | ATG5    | - | - | 0 |
| 54 | ATIC    | 0 | - | - |
| 55 | ATM     | 0 | 0 | 0 |
| 56 | ATR     | - | - | 0 |
| 57 | ATRX    | 0 | 0 | 0 |
| 58 | AXIN1   | 0 | 0 | 0 |
| 59 | B2M     | - | 0 | 0 |
| 60 | B3GNT5  | - | - | 0 |
| 61 | BAP1    | 0 | 0 | 0 |
| 62 | BAX     | - | - | 0 |
| 63 | BCL10   | 0 | - | 0 |
| 64 | BCL11A  | 0 | - | - |
| 65 | BCL11B  | 0 | - | - |
| 66 | BCL2    | 0 | 0 | - |
| 67 | BCL3    | 0 | - | - |
| 68 | BCL5    | 0 | - | - |
| 69 | BCL6    | 0 | - | - |
| 70 | BCL7A   | 0 | - | - |
| 71 | BCL9    | 0 | - | - |
| 72 | BCLAF1  | - | - | 0 |
| 73 | BCOR    | 0 | 0 | 0 |
| 74 | BCR     | 0 | - | - |
| 75 | BHD     | 0 | - | - |
| 76 | BIRC3   | 0 | - | - |
| 77 | BIRC6   | - | - | 0 |
| 78 | BLM     | 0 | - | - |
| 79 | BMPR1A  | 0 | - | - |
| 80 | BMPR2   | - | - | 0 |
| 81 | BRAF    | 0 | 0 | 0 |
| 82 | BRCA1   | 0 | 0 | 0 |
| 83 | BRCA2   | 0 | 0 | 0 |
| 84 | BRD3    | 0 | - | - |
| 85 | BRD4    | 0 | - | - |
| 86 | BRD7    | - | - | 0 |
| 87 | BRE     | - | - | 0 |
| 88 | BRIP1   | 0 | - | - |
| 89 | BRSK1   | - | - | 0 |
| 90 | BRWD3   | - | - | 0 |
| 91 | BTBD11  | - | - | 0 |
| 92 | BTBD7   | - | - | 0 |
| 93 | BTG1    | 0 | - | - |
| 94 | BTG3    | - | - | 0 |

|     |           |   |   |   |
|-----|-----------|---|---|---|
| 95  | BUB1B     | 0 | - | - |
| 96  | BZW2      | - | - | 0 |
| 97  | C12orf9   | 0 | - | - |
| 98  | C15orf21  | 0 | - | - |
| 99  | C15orf55  | 0 | - | - |
| 100 | C16orf45  | - | - | 0 |
| 101 | C16orf75  | 0 | - | - |
| 102 | C16orf80  | - | - | 0 |
| 103 | C16orf87  | - | - | 0 |
| 104 | C2CD5     | - | - | 0 |
| 105 | C2orf44   | 0 | - | - |
| 106 | C3orf27   | - | - | 0 |
| 107 | CACNG3    | - | - | 0 |
| 108 | CACUL1    | - | - | 0 |
| 109 | CADPS     | - | - | 0 |
| 110 | CAMTA1    | 0 | - | - |
| 111 | CANT1     | 0 | - | - |
| 112 | CAPRIN2   | - | - | 0 |
| 113 | CARD11    | 0 | 0 | - |
| 114 | CARM1     | - | - | 0 |
| 115 | CARS      | 0 | - | - |
| 116 | CASP8     | - | 0 | 0 |
| 117 | CBFA2T1   | 0 | - | - |
| 118 | CBFA2T3   | 0 | - | - |
| 119 | CBFB      | 0 | - | 0 |
| 120 | CBL       | 0 | 0 | - |
| 121 | CBLB      | 0 | - | - |
| 122 | CBLC      | 0 | - | - |
| 123 | CCAR1     | - | - | 0 |
| 124 | CCDC120   | - | - | 0 |
| 125 | CCDC132   | - | - | 0 |
| 126 | CCDC144NL | - | - | 0 |
| 127 | CCDC36    | - | - | 0 |
| 128 | CCDC38    | - | - | 0 |
| 129 | CCDC6     | 0 | - | - |
| 130 | CCDC88A   | - | - | 0 |
| 131 | CCNB1IP1  | 0 | - | - |
| 132 | CCND1     | 0 | 0 | - |
| 133 | CCND2     | 0 | - | - |
| 134 | CCND3     | 0 | - | 0 |
| 135 | CCNE1     | 0 | - | - |
| 136 | CD163     | - | - | 0 |
| 137 | CD273     | 0 | - | - |
| 138 | CD274     | 0 | - | - |
| 139 | CD58      | - | - | 0 |
| 140 | CD74      | 0 | - | - |
| 141 | CD79A     | 0 | - | - |
| 142 | CD79B     | 0 | - | - |

|     |             |   |   |   |
|-----|-------------|---|---|---|
| 143 | CDC27       | - | - | 0 |
| 144 | CDC73       | - | 0 | 0 |
| 145 | CDH1        | 0 | 0 | 0 |
| 146 | CDH11       | 0 | - | - |
| 147 | CDH7        | - | - | 0 |
| 148 | CDK12       | 0 | - | 0 |
| 149 | CDK4        | 0 | - | - |
| 150 | CDK6        | 0 | - | - |
| 151 | CDKN1A      | - | - | 0 |
| 152 | CDKN1B      | - | - | 0 |
| 153 | CDKN2A      | 0 | 0 | 0 |
| 154 | CDKN2a(p14) | 0 | - | - |
| 155 | CDKN2C      | 0 | 0 | - |
| 156 | CDX2        | 0 | - | - |
| 157 | CEBPA       | 0 | 0 | 0 |
| 158 | CEP1        | 0 | - | - |
| 159 | CEP128      | - | - | 0 |
| 160 | CERK        | - | - | 0 |
| 161 | CHCHD7      | 0 | - | - |
| 162 | CHD2        | - | - | 0 |
| 163 | CHD3        | - | - | 0 |
| 164 | CHD4        | - | - | 0 |
| 165 | CHD8        | - | - | 0 |
| 166 | CHEK2       | 0 | - | - |
| 167 | CHIC2       | 0 | - | - |
| 168 | CHN1        | 0 | - | - |
| 169 | CIC         | 0 | 0 | 0 |
| 170 | CIITA       | 0 | - | - |
| 171 | CIZ1        | - | - | 0 |
| 172 | CLGN        | - | - | 0 |
| 173 | CLTC        | 0 | - | - |
| 174 | CLTCL1      | 0 | - | - |
| 175 | CMAS        | - | - | 0 |
| 176 | CMKOR1      | 0 | - | - |
| 177 | CNOT3       | 0 | - | 0 |
| 178 | COL1A1      | 0 | - | - |
| 179 | COL4A2      | - | - | 0 |
| 180 | COL5A2      | - | - | 0 |
| 181 | COL8A2      | - | - | 0 |
| 182 | COL9A1      | - | - | 0 |
| 183 | COPEB       | 0 | - | - |
| 184 | COQ9        | - | - | 0 |
| 185 | COX6C       | 0 | - | - |
| 186 | CPB1        | - | - | 0 |
| 187 | CPEB2       | - | - | 0 |
| 188 | CREB1       | 0 | - | - |
| 189 | CREB3L1     | 0 | - | - |
| 190 | CREB3L2     | 0 | - | - |

|     |          |   |   |   |
|-----|----------|---|---|---|
| 191 | CREBBP   | 0 | 0 | 0 |
| 192 | CRIPAK   | - | - | 0 |
| 193 | CRISPLD1 | - | - | 0 |
| 194 | CRLF2    | 0 | 0 | - |
| 195 | CRTC3    | 0 | - | - |
| 196 | CSDE1    | - | - | 0 |
| 197 | CSF1R    | - | 0 | - |
| 198 | CSF3R    | 0 | - | - |
| 199 | CSMD3    | - | - | 0 |
| 200 | CSNK1E   | - | - | 0 |
| 201 | CSNK2A1  | - | - | 0 |
| 202 | CTCF     | - | - | 0 |
| 203 | CTDNEP1  | - | - | 0 |
| 204 | CTNNB1   | 0 | 0 | 0 |
| 205 | CTNND1   | - | - | 0 |
| 206 | CUL1     | - | - | 0 |
| 207 | CUL3     | - | - | 0 |
| 208 | CYLD     | 0 | 0 | 0 |
| 209 | D10S170  | 0 | - | - |
| 210 | DAAM1    | - | - | 0 |
| 211 | DACH1    | - | - | 0 |
| 212 | DAXX     | 0 | 0 | - |
| 213 | DCLK1    | - | - | 0 |
| 214 | DDB2     | 0 | - | - |
| 215 | DDIT3    | 0 | - | - |
| 216 | DDX10    | 0 | - | - |
| 217 | DDX3X    | - | - | 0 |
| 218 | DDX5     | 0 | - | - |
| 219 | DDX6     | 0 | - | - |
| 220 | DEK      | 0 | - | - |
| 221 | DENND6A  | - | - | 0 |
| 222 | DEPDC5   | - | - | 0 |
| 223 | DICER1   | 0 | - | 0 |
| 224 | DIP2C    | - | - | 0 |
| 225 | DKK2     | - | - | 0 |
| 226 | DNER     | - | - | 0 |
| 227 | DNM2     | 0 | - | - |
| 228 | DNMT1    | - | 0 | - |
| 229 | DNMT3A   | 0 | 0 | 0 |
| 230 | DOPEY1   | - | - | 0 |
| 231 | DPY19L4  | - | - | 0 |
| 232 | DTX1     | - | - | 0 |
| 233 | DUSP16   | - | - | 0 |
| 234 | DUX4     | 0 | - | - |
| 235 | DYRK1A   | - | - | 0 |
| 236 | EBF1     | 0 | - | - |
| 237 | EBPL     | - | - | 0 |
| 238 | ECT2L    | 0 | - | - |

|     |          |   |   |   |
|-----|----------|---|---|---|
| 239 | EEF1B2   | - | - | 0 |
| 240 | EGFR     | 0 | 0 | 0 |
| 241 | EIF1AX   | - | - | 0 |
| 242 | EIF2AK3  | - | - | 0 |
| 243 | EIF4A2   | 0 | - | - |
| 244 | ELF3     | - | - | 0 |
| 245 | ELF4     | 0 | - | - |
| 246 | ELK4     | 0 | - | - |
| 247 | ELKS     | 0 | - | - |
| 248 | ELL      | 0 | - | - |
| 249 | ELN      | 0 | - | - |
| 250 | EMG1     | - | - | 0 |
| 251 | EML4     | 0 | - | - |
| 252 | ENAH     | - | - | 0 |
| 253 | EP300    | 0 | 0 | 0 |
| 254 | EPB41L4A | - | - | 0 |
| 255 | EPHA2    | - | - | 0 |
| 256 | EPHA6    | - | - | 0 |
| 257 | EPS15    | 0 | - | - |
| 258 | ERBB2    | 0 | 0 | 0 |
| 259 | ERBB3    | - | - | 0 |
| 260 | ERCC2    | 0 | - | - |
| 261 | ERCC3    | 0 | - | - |
| 262 | ERCC4    | 0 | - | - |
| 263 | ERCC5    | 0 | - | - |
| 264 | ERG      | 0 | - | - |
| 265 | ERRFI1   | - | - | 0 |
| 266 | ETV1     | 0 | - | - |
| 267 | ETV4     | 0 | - | - |
| 268 | ETV5     | 0 | - | - |
| 269 | ETV6     | 0 | - | - |
| 270 | EVI1     | 0 | - | - |
| 271 | EWSR1    | 0 | - | - |
| 272 | EXO5     | - | - | 0 |
| 273 | EXT1     | 0 | - | - |
| 274 | EXT2     | 0 | - | - |
| 275 | EZH2     | 0 | 0 | 0 |
| 276 | EZR      | 0 | - | - |
| 277 | FACL6    | 0 | - | - |
| 278 | FAM123B  | - | 0 | - |
| 279 | FAM22A   | 0 | - | - |
| 280 | FAM22B   | 0 | - | - |
| 281 | FAM46C   | 0 | - | - |
| 282 | FAM58A   | - | - | 0 |
| 283 | FAM8A1   | - | - | 0 |
| 284 | FANCA    | 0 | - | - |
| 285 | FANCC    | 0 | - | - |
| 286 | FANCD2   | 0 | - | - |

|     |          |   |   |   |
|-----|----------|---|---|---|
| 287 | FANCE    | 0 | - | - |
| 288 | FANCF    | 0 | - | - |
| 289 | FANCG    | 0 | - | - |
| 290 | FANCM    | - | - | 0 |
| 291 | FAS      | - | - | 0 |
| 292 | FAT1     | - | - | 0 |
| 293 | FBXO11   | 0 | - | - |
| 294 | FBXW7    | 0 | 0 | 0 |
| 295 | FCGR2B   | 0 | - | - |
| 296 | FEV      | 0 | - | - |
| 297 | FGFR1    | 0 | - | - |
| 298 | FGFR1OP  | 0 | - | - |
| 299 | FGFR2    | 0 | 0 | 0 |
| 300 | FGFR3    | 0 | 0 | 0 |
| 301 | FH       | 0 | - | - |
| 302 | FHIT     | 0 | - | - |
| 303 | FIP1L1   | 0 | - | - |
| 304 | FLI1     | 0 | - | - |
| 305 | FLJ27352 | 0 | - | - |
| 306 | FLT3     | 0 | 0 | 0 |
| 307 | FMNL3    | - | - | 0 |
| 308 | FNBP1    | 0 | - | - |
| 309 | FOSL2    | - | - | 0 |
| 310 | FOXA1    | - | - | 0 |
| 311 | FOXL2    | 0 | 0 | - |
| 312 | FOXO1A   | 0 | - | - |
| 313 | FOXO3A   | 0 | - | - |
| 314 | FOXP1    | 0 | - | - |
| 315 | FSTL3    | 0 | - | - |
| 316 | FUBP1    | 0 | 0 | 0 |
| 317 | FUS      | 0 | - | - |
| 318 | FVT1     | 0 | - | - |
| 319 | GABRA1   | - | - | 0 |
| 320 | GABRA2   | - | - | 0 |
| 321 | GABRA5   | - | - | 0 |
| 322 | GABRG1   | - | - | 0 |
| 323 | GAPVD1   | - | - | 0 |
| 324 | GAS7     | 0 | - | - |
| 325 | GATA1    | 0 | 0 | - |
| 326 | GATA2    | 0 | 0 | - |
| 327 | GATA3    | 0 | 0 | 0 |
| 328 | GGCT     | - | - | 0 |
| 329 | GGNBP2   | - | - | 0 |
| 330 | GIGYF2   | - | - | 0 |
| 331 | GJB3     | - | - | 0 |
| 332 | GK2      | - | - | 0 |
| 333 | GLTSCR1  | - | - | 0 |
| 334 | GMPS     | 0 | - | - |

|     |           |   |   |   |
|-----|-----------|---|---|---|
| 335 | GNA11     | 0 | 0 | - |
| 336 | GNA15     | - | - | 0 |
| 337 | GNAQ      | 0 | 0 | - |
| 338 | GNAS      | 0 | 0 | 0 |
| 339 | GNG4      | - | - | 0 |
| 340 | GNPTAB    | - | - | 0 |
| 341 | GOLGA5    | 0 | - | - |
| 342 | GOPC      | 0 | - | - |
| 343 | GOT2      | - | - | 0 |
| 344 | GPC3      | 0 | - | - |
| 345 | GPHN      | 0 | - | - |
| 346 | GPR141    | - | - | 0 |
| 347 | GPR174    | - | - | 0 |
| 348 | GPS2      | - | - | 0 |
| 349 | GRAF      | 0 | - | - |
| 350 | GRIA2     | - | - | 0 |
| 351 | GRIA3     | - | - | 0 |
| 352 | GRID1     | - | - | 0 |
| 353 | GRID2     | - | - | 0 |
| 354 | GRM5      | - | - | 0 |
| 355 | GRXCR1    | - | - | 0 |
| 356 | GSE1      | - | - | 0 |
| 357 | GTF2I     | - | - | 0 |
| 358 | H3F3A     | 0 | 0 | - |
| 359 | HARS2     | - | - | 0 |
| 360 | HAUS8     | - | - | 0 |
| 361 | HCMOGT-1  | 0 | - | - |
| 362 | HDAC2     | - | - | 0 |
| 363 | HEAB      | 0 | - | - |
| 364 | HERC1     | - | - | 0 |
| 365 | HERPUD1   | 0 | - | - |
| 366 | HEY1      | 0 | - | - |
| 367 | HGF       | - | - | 0 |
| 368 | HIP1      | 0 | - | - |
| 369 | HIST1H2BF | - | - | 0 |
| 370 | HIST1H3B  | 0 | 0 | 0 |
| 371 | HIST1H4I  | 0 | - | - |
| 372 | HLA-A     | - | - | 0 |
| 373 | HLA-B     | - | - | 0 |
| 374 | HLA-DRB1  | - | - | 0 |
| 375 | HLF       | 0 | - | 0 |
| 376 | HLXB9     | 0 | - | - |
| 377 | HMCN1     | - | - | 0 |
| 378 | HMGA1     | 0 | - | - |
| 379 | HMGA2     | 0 | - | - |
| 380 | HNF1A     | - | 0 | 0 |
| 381 | HNRNPA2B1 | 0 | - | - |
| 382 | HNRNPD    | - | - | 0 |



|     |         |   |   |   |
|-----|---------|---|---|---|
| 383 | HOOK3   | 0 | - | - |
| 384 | HOXA11  | 0 | - | - |
| 385 | HOXA13  | 0 | - | - |
| 386 | HOXA9   | 0 | - | - |
| 387 | HOXC11  | 0 | - | - |
| 388 | HOXC13  | 0 | - | - |
| 389 | HOXD11  | 0 | - | - |
| 390 | HOXD13  | 0 | - | - |
| 391 | HRAS    | 0 | 0 | 0 |
| 392 | HRPT2   | 0 | - | - |
| 393 | HS6ST1  | - | - | 0 |
| 394 | HSPCA   | 0 | - | - |
| 395 | HSPCB   | 0 | - | - |
| 396 | ID3     | - | - | 0 |
| 397 | IDH1    | 0 | 0 | 0 |
| 398 | IDH2    | 0 | 0 | 0 |
| 399 | IFITM1  | - | - | 0 |
| 400 | IFNGR2  | - | - | 0 |
| 401 | IGH@    | 0 | - | - |
| 402 | IGK@    | 0 | - | - |
| 403 | IGL@    | 0 | - | - |
| 404 | IKZF1   | 0 | 0 | - |
| 405 | IL2     | 0 | - | - |
| 406 | IL21    | - | - | 0 |
| 407 | IL21R   | 0 | - | - |
| 408 | IL32    | - | - | 0 |
| 409 | IL5RA   | - | - | 0 |
| 410 | IL6ST   | 0 | - | - |
| 411 | IL7R    | 0 | - | - |
| 412 | INO80   | - | - | 0 |
| 413 | INPPL1  | - | - | 0 |
| 414 | INTS7   | - | - | 0 |
| 415 | IREB2   | - | - | 0 |
| 416 | IRF2    | - | - | 0 |
| 417 | IRF4    | 0 | - | - |
| 418 | IRTA1   | 0 | - | - |
| 419 | ITK     | 0 | - | - |
| 420 | ITM2C   | - | - | 0 |
| 421 | IWS1    | - | - | 0 |
| 422 | JAK1    | 0 | 0 | - |
| 423 | JAK2    | 0 | 0 | - |
| 424 | JAK3    | 0 | 0 | - |
| 425 | JAKMIP2 | - | - | 0 |
| 426 | JAZF1   | 0 | - | - |
| 427 | JMJD1C  | - | - | 0 |
| 428 | JUN     | 0 | - | 0 |
| 429 | KANSL1  | - | - | 0 |
| 430 | KAT8    | - | - | 0 |

|     |           |   |   |   |
|-----|-----------|---|---|---|
| 431 | KBTBD7    | - | - | 0 |
| 432 | KCND3     | - | - | 0 |
| 433 | KCNJ5     | 0 | - | - |
| 434 | KCNMB2    | - | - | 0 |
| 435 | KCNQ5     | - | - | 0 |
| 436 | KCNT2     | - | - | 0 |
| 437 | KDM3B     | - | - | 0 |
| 438 | KDM5A     | 0 | - | - |
| 439 | KDM5C     | 0 | 0 | 0 |
| 440 | KDM6A     | 0 | 0 | 0 |
| 441 | KDR       | 0 | - | - |
| 442 | KEAP1     | - | - | 0 |
| 443 | KIAA0907  | - | - | 0 |
| 444 | KIAA1549  | 0 | - | - |
| 445 | KIF5B     | 0 | - | - |
| 446 | KIT       | 0 | 0 | - |
| 447 | KLF4      | 0 | 0 | - |
| 448 | KLHL5     | - | - | 0 |
| 449 | KLK2      | 0 | - | - |
| 450 | KLK8      | - | - | 0 |
| 451 | KMT2A     | - | - | 0 |
| 452 | KMT2B     | - | - | 0 |
| 453 | KMT2C     | - | - | 0 |
| 454 | KMT2D     | - | - | 0 |
| 455 | KRAS      | 0 | 0 | 0 |
| 456 | KRT15     | - | - | 0 |
| 457 | KRTAP4-11 | - | - | 0 |
| 458 | KRTAP4-5  | - | - | 0 |
| 459 | KTN1      | 0 | - | - |
| 460 | LAF4      | 0 | - | - |
| 461 | LARP4B    | - | - | 0 |
| 462 | LASP1     | 0 | - | - |
| 463 | LCK       | 0 | - | - |
| 464 | LCP1      | 0 | - | - |
| 465 | LCX       | 0 | - | - |
| 466 | LDB1      | - | - | 0 |
| 467 | LEMD2     | - | - | 0 |
| 468 | LHFP      | 0 | - | - |
| 469 | LHFPL1    | - | - | 0 |
| 470 | LIFR      | 0 | - | - |
| 471 | LIMCH1    | - | - | 0 |
| 472 | LIN9      | - | - | 0 |
| 473 | LMO1      | 0 | 0 | - |
| 474 | LMO2      | 0 | - | - |
| 475 | LPA       | - | - | 0 |
| 476 | LPHN3     | - | - | 0 |
| 477 | LPP       | 0 | - | - |
| 478 | LRIG3     | 0 | - | - |

|     |               |   |   |   |
|-----|---------------|---|---|---|
| 479 | LSM11         | - | - | 0 |
| 480 | LUC7L3        | - | - | 0 |
| 481 | LUM           | - | - | 0 |
| 482 | LYL1          | 0 | - | - |
| 483 | LZTR1         | - | - | 0 |
| 484 | MADH4         | 0 | - | - |
| 485 | MAF           | 0 | - | - |
| 486 | MAFB          | 0 | - | - |
| 487 | MAGED1        | - | - | 0 |
| 488 | MAGI2         | - | - | 0 |
| 489 | MALT1         | 0 | - | - |
| 490 | MAML2         | 0 | - | - |
| 491 | MAP2K1        | 0 | 0 | 0 |
| 492 | MAP2K2        | 0 | - | - |
| 493 | MAP2K4        | 0 | 0 | 0 |
| 494 | MAP3K1        | - | 0 | 0 |
| 495 | MAP3K4        | - | - | 0 |
| 496 | MAPK1         | - | - | 0 |
| 497 | MAPK8         | - | - | 0 |
| 498 | MAPK8IP2      | - | - | 0 |
| 499 | MARCO         | - | - | 0 |
| 500 | MAX           | 0 | - | 0 |
| 501 | MB21D2        | - | - | 0 |
| 502 | MBD1          | - | - | 0 |
| 503 | MBD6          | - | - | 0 |
| 504 | MBOAT2        | - | - | 0 |
| 505 | MDGA2         | - | - | 0 |
| 506 | MDM2          | 0 | 0 | - |
| 507 | MDM4          | 0 | 0 | - |
| 508 | MDS1          | 0 | - | - |
| 509 | MDS2          | 0 | - | - |
| 510 | MECOM         | - | - | 0 |
| 511 | MECT1         | 0 | - | - |
| 512 | MED12         | 0 | 0 | 0 |
| 513 | MED23         | - | - | 0 |
| 514 | MEF2B         | - | - | 0 |
| 515 | MEF2BNB-MEF2B | - | - | 0 |
| 516 | MEN1          | 0 | 0 | 0 |
| 517 | MET           | 0 | 0 | - |
| 518 | METTL14       | - | - | 0 |
| 519 | MFAP5         | - | - | 0 |
| 520 | MFF           | - | - | 0 |
| 521 | MFGE8         | - | - | 0 |
| 522 | MGA           | - | - | 0 |
| 523 | MICU3         | - | - | 0 |
| 524 | MITF          | 0 | - | - |
| 525 | MKL1          | 0 | - | - |
| 526 | MKRN1         | - | - | 0 |

|     |        |   |   |   |
|-----|--------|---|---|---|
| 527 | MLF1   | 0 | - | - |
| 528 | MLH1   | 0 | 0 | - |
| 529 | MLL    | 0 | - | - |
| 530 | MLL2   | 0 | 0 | - |
| 531 | MLL3   | 0 | 0 | - |
| 532 | MLLT1  | 0 | - | - |
| 533 | MLLT10 | 0 | - | - |
| 534 | MLLT11 | - | - | 0 |
| 535 | MLLT2  | 0 | - | - |
| 536 | MLLT3  | 0 | - | - |
| 537 | MLLT4  | 0 | - | 0 |
| 538 | MLLT6  | 0 | - | - |
| 539 | MLLT7  | 0 | - | - |
| 540 | MN1    | 0 | - | - |
| 541 | MOAP1  | - | - | 0 |
| 542 | MORC4  | - | - | 0 |
| 543 | MPL    | 0 | 0 | - |
| 544 | MRPL32 | - | - | 0 |
| 545 | MRPL49 | - | - | 0 |
| 546 | MS4A8  | - | - | 0 |
| 547 | MSF    | 0 | - | - |
| 548 | MSH2   | 0 | 0 | - |
| 549 | MSH6   | 0 | 0 | - |
| 550 | MSI2   | 0 | - | - |
| 551 | MSN    | 0 | - | - |
| 552 | MTCP1  | 0 | - | - |
| 553 | MTFR1L | - | - | 0 |
| 554 | MTOR   | - | - | 0 |
| 555 | MUC1   | 0 | - | - |
| 556 | MUTYH  | 0 | - | - |
| 557 | MYB    | 0 | - | - |
| 558 | MYC    | 0 | 0 | 0 |
| 559 | MYCL1  | 0 | 0 | - |
| 560 | MYCN   | 0 | 0 | 0 |
| 561 | MYD88  | 0 | 0 | 0 |
| 562 | MYF5   | - | - | 0 |
| 563 | MYH11  | 0 | - | - |
| 564 | MYH2   | - | - | 0 |
| 565 | MYH9   | 0 | - | - |
| 566 | MYO1B  | - | - | 0 |
| 567 | MYO3A  | - | - | 0 |
| 568 | MYO6   | - | - | 0 |
| 569 | MYOT   | - | - | 0 |
| 570 | MYST4  | 0 | - | - |
| 571 | NAA25  | - | - | 0 |
| 572 | NACA   | 0 | - | - |
| 573 | NBPF1  | - | - | 0 |
| 574 | NBPF10 | - | - | 0 |

|     |          |   |   |   |
|-----|----------|---|---|---|
| 575 | NBS1     | 0 | - | - |
| 576 | NCOA1    | 0 | - | - |
| 577 | NCOA2    | 0 | - | - |
| 578 | NCOA3    | - | 0 | - |
| 579 | NCOA4    | 0 | - | - |
| 580 | NCOR1    | - | 0 | 0 |
| 581 | NCOR2    | - | - | 0 |
| 582 | NDRG1    | 0 | - | - |
| 583 | NDUFS5   | - | - | 0 |
| 584 | NEK9     | - | - | 0 |
| 585 | NENF     | - | - | 0 |
| 586 | NF1      | 0 | 0 | 0 |
| 587 | NF2      | 0 | 0 | 0 |
| 588 | NFATC4   | - | - | 0 |
| 589 | NFE2L2   | 0 | 0 | 0 |
| 590 | NFIB     | 0 | - | - |
| 591 | NFKB2    | 0 | - | - |
| 592 | NIN      | 0 | - | - |
| 593 | NIPBL    | - | - | 0 |
| 594 | NKX2-1   | 0 | 0 | - |
| 595 | NNMT     | - | - | 0 |
| 596 | NONO     | 0 | - | - |
| 597 | NOTCH1   | 0 | 0 | 0 |
| 598 | NOTCH2   | 0 | 0 | 0 |
| 599 | NPM1     | 0 | 0 | 0 |
| 600 | NR4A3    | 0 | - | - |
| 601 | NRAP     | - | - | 0 |
| 602 | NRAS     | 0 | 0 | 0 |
| 603 | NRG3     | - | - | 0 |
| 604 | NSD1     | 0 | - | 0 |
| 605 | NSFL1C   | - | - | 0 |
| 606 | NSMCE1   | - | - | 0 |
| 607 | NT5C2    | 0 | - | - |
| 608 | NTRK1    | 0 | - | - |
| 609 | NTRK3    | 0 | - | - |
| 610 | NUMA1    | 0 | - | - |
| 611 | NUP214   | 0 | - | - |
| 612 | NUP98    | 0 | - | 0 |
| 613 | NUTM2F   | - | - | 0 |
| 614 | OLIG2    | 0 | - | - |
| 615 | OMD      | 0 | - | - |
| 616 | OPRM1    | - | - | 0 |
| 617 | OR4M2    | - | - | 0 |
| 618 | OR511    | - | - | 0 |
| 619 | P2RY8    | 0 | - | - |
| 620 | PABPC3   | - | - | 0 |
| 621 | PAFAH1B2 | 0 | - | - |
| 622 | PALB2    | 0 | - | - |

|     |         |   |   |   |
|-----|---------|---|---|---|
| 623 | PAX3    | 0 | - | - |
| 624 | PAX5    | 0 | 0 | - |
| 625 | PAX7    | 0 | - | - |
| 626 | PAX8    | 0 | - | - |
| 627 | PBRM1   | 0 | 0 | 0 |
| 628 | PBX1    | 0 | - | - |
| 629 | PCDH7   | - | - | 0 |
| 630 | PCM1    | 0 | - | - |
| 631 | PCMTD1  | - | - | 0 |
| 632 | PCSK7   | 0 | - | - |
| 633 | PDE4DIP | 0 | - | - |
| 634 | PDE7B   | - | - | 0 |
| 635 | PDGFB   | 0 | - | - |
| 636 | PDGFRA  | 0 | 0 | - |
| 637 | PDGFRB  | 0 | - | - |
| 638 | PDYN    | - | - | 0 |
| 639 | PER1    | 0 | - | - |
| 640 | PEX2    | - | - | 0 |
| 641 | PGM5    | - | - | 0 |
| 642 | PHACTR4 | - | - | 0 |
| 643 | PHF6    | 0 | 0 | 0 |
| 644 | PHOX2B  | 0 | - | - |
| 645 | PICALM  | 0 | - | - |
| 646 | PIK3CA  | 0 | 0 | 0 |
| 647 | PIK3CB  | - | - | 0 |
| 648 | PIK3R1  | 0 | 0 | 0 |
| 649 | PIK3R5  | - | - | 0 |
| 650 | PIM1    | 0 | - | - |
| 651 | PLAC4   | - | - | 0 |
| 652 | PLAG1   | 0 | - | - |
| 653 | PLCL1   | - | - | 0 |
| 654 | PLEKHA6 | - | - | 0 |
| 655 | PLEKHM3 | - | - | 0 |
| 656 | PLK2    | - | - | 0 |
| 657 | PML     | 0 | - | - |
| 658 | PMS1    | 0 | - | - |
| 659 | PMS2    | 0 | - | - |
| 660 | PMX1    | 0 | - | - |
| 661 | PNISR   | - | - | 0 |
| 662 | PNUTL1  | 0 | - | - |
| 663 | POLE    | - | - | 0 |
| 664 | POT1    | 0 | - | - |
| 665 | POTEG   | - | - | 0 |
| 666 | POU2AF1 | 0 | - | - |
| 667 | POU5F1  | 0 | - | - |
| 668 | PPARG   | 0 | - | - |
| 669 | PPM1D   | - | - | 0 |
| 670 | PPP1R9A | - | - | 0 |

|     |          |   |   |   |
|-----|----------|---|---|---|
| 671 | PPP2R1A  | 0 | 0 | 0 |
| 672 | PPP3CC   | - | - | 0 |
| 673 | PPP6C    | - | - | 0 |
| 674 | PRCC     | 0 | - | - |
| 675 | PRDM1    | 0 | 0 | - |
| 676 | PRDM16   | 0 | - | - |
| 677 | PRF1     | 0 | - | - |
| 678 | PRKAR1A  | 0 | - | - |
| 679 | PRKCI    | - | - | 0 |
| 680 | PRKRA    | - | - | 0 |
| 681 | PRO1073  | 0 | - | - |
| 682 | PRPF40A  | - | - | 0 |
| 683 | PRPF8    | - | - | 0 |
| 684 | PRRC2C   | - | - | 0 |
| 685 | PRRX1    | - | - | 0 |
| 686 | PSIP1    | - | - | 0 |
| 687 | PSIP2    | 0 | - | - |
| 688 | PSMC3IP  | - | - | 0 |
| 689 | PSPH     | - | - | 0 |
| 690 | PTCH     | 0 | - | - |
| 691 | PTCH1    | - | 0 | 0 |
| 692 | PTEN     | 0 | 0 | 0 |
| 693 | PTN      | - | - | 0 |
| 694 | PTPN11   | 0 | 0 | 0 |
| 695 | PTPRC    | 0 | - | - |
| 696 | PTPRF    | - | - | 0 |
| 697 | PTPRK    | - | - | 0 |
| 698 | PTPRU    | - | - | 0 |
| 699 | PUS7     | - | - | 0 |
| 700 | RAB5EP   | 0 | - | - |
| 701 | RAC1     | 0 | - | 0 |
| 702 | RAD21    | 0 | - | 0 |
| 703 | RAD51L1  | 0 | - | - |
| 704 | RAF1     | 0 | - | - |
| 705 | RALGDS   | 0 | - | - |
| 706 | RANBP17  | 0 | - | - |
| 707 | RAP1GDS1 | 0 | - | - |
| 708 | RAPGEF6  | - | - | 0 |
| 709 | RARA     | 0 | - | - |
| 710 | RASA1    | - | - | 0 |
| 711 | RB1      | 0 | 0 | 0 |
| 712 | RBBP6    | - | - | 0 |
| 713 | RBM10    | - | - | 0 |
| 714 | RBM15    | 0 | - | 0 |
| 715 | RBM26    | - | - | 0 |
| 716 | RBM39    | - | - | 0 |
| 717 | RBMX     | - | - | 0 |
| 718 | RECQL4   | 0 | - | - |

|     |         |   |   |   |
|-----|---------|---|---|---|
| 719 | REL     | 0 | - | - |
| 720 | RERE    | - | - | 0 |
| 721 | RET     | 0 | 0 | - |
| 722 | REXO2   | - | - | 0 |
| 723 | RGPD3   | - | - | 0 |
| 724 | RGS12   | - | - | 0 |
| 725 | RHBDL3  | - | - | 0 |
| 726 | RHOA    | - | - | 0 |
| 727 | RIMS2   | - | - | 0 |
| 728 | RIT1    | - | - | 0 |
| 729 | RNF111  | - | - | 0 |
| 730 | RNF43   | 0 | 0 | 0 |
| 731 | ROS1    | 0 | - | - |
| 732 | RPL10   | 0 | - | - |
| 733 | RPL18   | - | - | 0 |
| 734 | RPL22   | 0 | - | 0 |
| 735 | RPL5    | 0 | - | 0 |
| 736 | RPN1    | 0 | - | - |
| 737 | RRAS2   | - | - | 0 |
| 738 | RUFY2   | - | - | 0 |
| 739 | RUNDC2A | 0 | - | - |
| 740 | RUNX1   | 0 | 0 | 0 |
| 741 | RUNXBP2 | 0 | - | - |
| 742 | RXRB    | - | - | 0 |
| 743 | SAP30   | - | - | 0 |
| 744 | SBDS    | 0 | - | - |
| 745 | SBNO1   | - | - | 0 |
| 746 | SCN3A   | - | - | 0 |
| 747 | SCRN3   | - | - | 0 |
| 748 | SDC4    | 0 | - | - |
| 749 | SDH5    | 0 | - | - |
| 750 | SDHB    | 0 | - | - |
| 751 | SDHC    | 0 | - | - |
| 752 | SDHD    | 0 | - | - |
| 753 | SEC22A  | - | - | 0 |
| 754 | SEC63   | - | - | 0 |
| 755 | SEMG2   | - | - | 0 |
| 756 | SEPT14  | - | - | 0 |
| 757 | SEPT6   | 0 | - | - |
| 758 | SESTD1  | - | - | 0 |
| 759 | SET     | 0 | - | - |
| 760 | SETBP1  | 0 | 0 | - |
| 761 | SETD2   | 0 | 0 | 0 |
| 762 | SF3B1   | 0 | 0 | 0 |
| 763 | SFPQ    | 0 | - | 0 |
| 764 | SFRS3   | 0 | - | - |
| 765 | SH2B3   | 0 | - | - |
| 766 | SH3GL1  | 0 | - | - |



|     |         |   |   |   |
|-----|---------|---|---|---|
| 767 | SHB     | - | - | 0 |
| 768 | SIAH2   | - | - | 0 |
| 769 | SIK3    | - | - | 0 |
| 770 | SIL     | 0 | - | - |
| 771 | SIN3A   | - | - | 0 |
| 772 | SKAP2   | - | - | 0 |
| 773 | SKP2    | - | 0 | - |
| 774 | SLC23A2 | - | - | 0 |
| 775 | SLC34A2 | 0 | - | - |
| 776 | SLC35G3 | - | - | 0 |
| 777 | SLC45A3 | 0 | - | - |
| 778 | SMAD2   | - | 0 | 0 |
| 779 | SMAD4   | - | 0 | 0 |
| 780 | SMARCA1 | - | - | 0 |
| 781 | SMARCA2 | - | - | 0 |
| 782 | SMARCA4 | 0 | 0 | 0 |
| 783 | SMARCB1 | 0 | 0 | 0 |
| 784 | SMARCE1 | 0 | - | - |
| 785 | SMC4    | - | - | 0 |
| 786 | SMO     | 0 | 0 | 0 |
| 787 | SMOC2   | - | - | 0 |
| 788 | SNRPN   | - | - | 0 |
| 789 | SOCS1   | 0 | 0 | - |
| 790 | SOCS5   | - | - | 0 |
| 791 | SOS1    | - | - | 0 |
| 792 | SOX17   | - | - | 0 |
| 793 | SOX2    | 0 | - | - |
| 794 | SOX21   | - | - | 0 |
| 795 | SOX9    | - | 0 | 0 |
| 796 | SPATA6  | - | - | 0 |
| 797 | SPCS1   | - | - | 0 |
| 798 | SPEN    | - | - | 0 |
| 799 | SPOP    | - | 0 | 0 |
| 800 | SPPL3   | - | - | 0 |
| 801 | SPRED1  | - | - | 0 |
| 802 | SPRED2  | - | - | 0 |
| 803 | SPSB2   | - | - | 0 |
| 804 | SRC     | - | - | 0 |
| 805 | SRGAP3  | 0 | - | - |
| 806 | SRSF11  | - | - | 0 |
| 807 | SRSF2   | 0 | 0 | - |
| 808 | SS18    | 0 | - | - |
| 809 | SS18L1  | 0 | - | - |
| 810 | SSX1    | 0 | - | - |
| 811 | SSX2    | 0 | - | - |
| 812 | SSX4    | 0 | - | - |
| 813 | STAG2   | - | 0 | 0 |
| 814 | STAT3   | 0 | - | 0 |

|     |          |   |   |   |
|-----|----------|---|---|---|
| 815 | STAT5B   | 0 | - | - |
| 816 | STK11    | 0 | 0 | 0 |
| 817 | STL      | 0 | - | - |
| 818 | STRIP2   | - | - | 0 |
| 819 | STX7     | - | - | 0 |
| 820 | STXBP1   | - | - | 0 |
| 821 | STXBP6   | - | - | 0 |
| 822 | SUFU     | 0 | - | - |
| 823 | SULT1C4  | - | - | 0 |
| 824 | SUZ12    | 0 | - | 0 |
| 825 | SYK      | 0 | - | - |
| 826 | TAF1     | - | - | 0 |
| 827 | TAF15    | 0 | - | - |
| 828 | TAL1     | 0 | - | - |
| 829 | TAL2     | 0 | - | - |
| 830 | TAOK1    | - | - | 0 |
| 831 | TBC1D10C | - | - | 0 |
| 832 | TBL1XR1  | - | - | 0 |
| 833 | TBL1XR1  | 0 | - | - |
| 834 | TBX15    | - | - | 0 |
| 835 | TBX18    | - | - | 0 |
| 836 | TBX3     | - | - | 0 |
| 837 | TCEA1    | 0 | - | - |
| 838 | TCEB3    | - | - | 0 |
| 839 | TCF1     | 0 | - | - |
| 840 | TCF12    | 0 | - | 0 |
| 841 | TCF3     | 0 | - | - |
| 842 | TCF7L2   | 0 | - | 0 |
| 843 | TCL1A    | 0 | - | - |
| 844 | TCL6     | 0 | - | - |
| 845 | TERT     | 0 | - | - |
| 846 | TES      | - | - | 0 |
| 847 | TET2     | 0 | 0 | 0 |
| 848 | TEX11    | - | - | 0 |
| 849 | TFE3     | 0 | - | - |
| 850 | TFEB     | 0 | - | - |
| 851 | TFG      | 0 | - | - |
| 852 | TFPT     | 0 | - | - |
| 853 | TFRC     | 0 | - | - |
| 854 | TGFBR2   | - | - | 0 |
| 855 | THRAP3   | 0 | - | 0 |
| 856 | THUMPD3  | - | - | 0 |
| 857 | TIF1     | 0 | - | - |
| 858 | TKTL2    | - | - | 0 |
| 859 | TLL1     | - | - | 0 |
| 860 | TLL2     | - | - | 0 |
| 861 | TLX1     | 0 | - | - |
| 862 | TLX3     | 0 | - | - |

|     |          |   |   |   |
|-----|----------|---|---|---|
| 863 | TM2D3    | - | - | 0 |
| 864 | TMCO2    | - | - | 0 |
| 865 | TMEM11   | - | - | 0 |
| 866 | TMEM30A  | - | - | 0 |
| 867 | TMPO     | - | - | 0 |
| 868 | TMPRSS2  | 0 | - | - |
| 869 | TNFAIP3  | 0 | 0 | - |
| 870 | TNFRSF14 | 0 | - | - |
| 871 | TNFRSF17 | 0 | - | - |
| 872 | TNFRSF6  | 0 | - | - |
| 873 | TNIK     | - | - | 0 |
| 874 | TNRC6B   | - | - | 0 |
| 875 | TOP1     | 0 | - | - |
| 876 | TOR1A    | - | - | 0 |
| 877 | TOX      | - | - | 0 |
| 878 | TP53     | 0 | 0 | 0 |
| 879 | TP53BP1  | - | - | 0 |
| 880 | TPM3     | 0 | - | - |
| 881 | TPM4     | 0 | - | - |
| 882 | TPR      | 0 | - | - |
| 883 | TRA@     | 0 | - | - |
| 884 | TRAF3    | - | - | 0 |
| 885 | TRAF7    | 0 | 0 | - |
| 886 | TRB@     | 0 | - | - |
| 887 | TRD@     | 0 | - | - |
| 888 | TRIM23   | - | - | 0 |
| 889 | TRIM27   | 0 | - | - |
| 890 | TRIM33   | 0 | - | - |
| 891 | TRIM48   | - | - | 0 |
| 892 | TRIP11   | 0 | - | - |
| 893 | TRIP12   | - | - | 0 |
| 894 | TRPC6    | - | - | 0 |
| 895 | TSC1     | 0 | 0 | - |
| 896 | TSC2     | 0 | - | - |
| 897 | TSHR     | 0 | 0 | - |
| 898 | TTC18    | - | - | 0 |
| 899 | TTL      | 0 | - | - |
| 900 | TUSC3    | - | - | 0 |
| 901 | TXNRD1   | - | - | 0 |
| 902 | TYRP1    | - | - | 0 |
| 903 | U2AF1    | 0 | 0 | 0 |
| 904 | UBE2QL1  | - | - | 0 |
| 905 | UBQLN2   | - | - | 0 |
| 906 | UBR5     | - | - | 0 |
| 907 | UBR5     | 0 | - | - |
| 908 | UGT2A2   | - | - | 0 |
| 909 | UGT8     | - | - | 0 |
| 910 | UPF3B    | - | - | 0 |

|     |         |   |   |   |
|-----|---------|---|---|---|
| 911 | USP28   | - | - | 0 |
| 912 | USP6    | 0 | - | - |
| 913 | USP9X   | - | - | 0 |
| 914 | VHL     | 0 | 0 | 0 |
| 915 | VPS13A  | - | - | 0 |
| 916 | VTI1A   | 0 | - | - |
| 917 | WAC     | - | - | 0 |
| 918 | WAS     | 0 | - | - |
| 919 | WBP1    | - | - | 0 |
| 920 | WBSCR17 | - | - | 0 |
| 921 | WDR17   | - | - | 0 |
| 922 | WDR33   | - | - | 0 |
| 923 | WDR47   | - | - | 0 |
| 924 | WHSC1   | 0 | - | - |
| 925 | WHSC1L1 | 0 | - | - |
| 926 | WIF1    | 0 | - | - |
| 927 | WNT11   | - | - | 0 |
| 928 | WRN     | 0 | - | - |
| 929 | WT1     | 0 | 0 | 0 |
| 930 | WTX     | 0 | - | - |
| 931 | WWC2    | - | - | 0 |
| 932 | WWTR1   | 0 | - | - |
| 933 | XPA     | 0 | - | - |
| 934 | XPC     | 0 | - | - |
| 935 | XPO1    | 0 | - | - |
| 936 | XPOT    | - | - | 0 |
| 937 | XYLT1   | - | - | 0 |
| 938 | YLPM1   | - | - | 0 |
| 939 | YWHAE   | 0 | - | - |
| 940 | ZBTB18  | - | - | 0 |
| 941 | ZBTB7A  | - | - | 0 |
| 942 | ZC3H13  | - | - | 0 |
| 943 | ZC3H18  | - | - | 0 |
| 944 | ZFP2    | - | - | 0 |
| 945 | ZFP36L1 | - | - | 0 |
| 946 | ZFP36L2 | - | - | 0 |
| 947 | ZFR     | - | - | 0 |
| 948 | ZMYM3   | - | - | 0 |
| 949 | ZMYM4   | - | - | 0 |
| 950 | ZNF117  | - | - | 0 |
| 951 | ZNF145  | 0 | - | - |
| 952 | ZNF181  | - | - | 0 |
| 953 | ZNF198  | 0 | - | - |
| 954 | ZNF234  | - | - | 0 |
| 955 | ZNF263  | - | - | 0 |
| 956 | ZNF278  | 0 | - | - |
| 957 | ZNF292  | - | - | 0 |
| 958 | ZNF318  | - | - | 0 |

|     |        |   |   |   |
|-----|--------|---|---|---|
| 959 | ZNF319 | - | - | 0 |
| 960 | ZNF331 | 0 | - | - |
| 961 | ZNF384 | 0 | - | - |
| 962 | ZNF479 | - | - | 0 |
| 963 | ZNF521 | 0 | - | - |
| 964 | ZNF559 | - | - | 0 |
| 965 | ZNF750 | - | - | 0 |
| 966 | ZNF799 | - | - | 0 |
| 967 | ZNF844 | - | - | 0 |
| 968 | ZNF878 | - | - | 0 |
| 969 | ZNF9   | 0 | - | - |
| 970 | ZNRF3  | - | - | 0 |
| 971 | ZRSR2  | 0 | - | - |
